# Supplementary material
Source: publisher figshare collection journal article supplement (https://gsapubs.figshare.com/ndownloader/files/22756673)
Supplement: Supplementary file 1 [file 22756673]

**Data Repository to accompany Tulloch et al.; U-Pb geochronology of Paleozoic plutonism in western New Zealand: implications for S-type granite generation and growth of the east Gondwana margin.**

**SAMPLED PLUTONS**

Plutons are described in an approximate north to south order within the Nelson, Fiordland and Stewart Island blocks.

**Nelson Block**

*Oparara (quarry) granite* is K-feldspar-megacrystic biotite granite typical of much of the northern Karamea Batholith (Rattenbury et al., 1998; Grindley's, (1978) regional 'Karamea Granite'). Aronson (1968) determined Rb-Sr ages of  $348 \pm 9$  on muscovite and  $355 \pm 9$  Ma on biotite from the same site.

*Flanagan quartz diorite* is equigranular hornblende-biotite quartz diorite. The body is not well mapped, but underlies at least the southern half of a 100nT magnetic anomaly (Reilly, 1970; Tulloch, 1989). Hornblende and biotite K-Ar ages of 162 and 127 Ma have been determined on the same sample (Nathan, et al., 2000).

*Domett granite* is a medium grained biotite granite from the belt of equigranular granite mapped by Grindley (1978) and Rattenbury et al., (1998; Dke Unit).

*Richmond Hill granite*. This fine-grained biotite granite (500m x 300m) occurs in tectonic contact with schistose Takaka Terrane metasedimentary rocks (Wilson, 1999). Although grouped with a number of small bodies of fine grained igneous rocks from northwest Nelson (some of which intrude Permian sedimentary rocks) by Grindley (1971) the type locality is characterised by deformational augen, not phenocrysts, and we consider the name *granite* more appropriate than *porphyry*. The small body is significant because of Ag-Pb mineralisation.

*Foulwind Granite* (Nathan, 1976) outcrops over an area of approximately 3 km<sup>2</sup> at Cape Foulwind. The main phase contains megacrysts of K-feldspar up to 4 cm-long in a medium-coarse (1-10mm) groundmass composed of plagioclase laths set in a matrix of finer grained plagioclase, brown biotite, microcline, quartz and minor muscovite and sporadic coarse, fractured and partly altered Mn-rich garnet. Although plagioclase exhibits only minor deformation of twin lamellae, biotite, microcline and quartz are moderately highly strained and/or partly recrystallised. Zircon, apatite, monazite and less commonly xenotime, are observed as accessory phases. Biotite-rich, hornblende-bearing, granodiorite (Kf1a) with similar chemical characteristics to the granite occurs about 2 km to the south of Cape Foulwind. *Crosscut Granite* is a K-feldspar-megacrystic biotite granite which forms much of the northern Victoria Range (Tulloch, 1979). Intrusive relationships with adjacent Paleozoic plutons have not been observed.

*Riwaka Complex* (Grindley, 1980) comprises a 8 x 40 km layered lopolith of mafic and ultramafic rocks which intrude Ordovician-Silurian metasedimentary rocks. The dated samples are both from the Brooklyn Diorite which comprises the bulk of the northern part of the Riwaka Complex, and is interpreted as the upper marginal part of the layered intrusion. This unit consists of massive non-cumulate two-pyroxene biotite monzodiorite. Harrison and McDougall, (1980) reported a  $367 \pm 3$  Ma K-Ar hornblende age from the Rameka Gabbro phase to the north. Muir et al., (1996a) reported a significantly older SHRIMP zircon age of  $376.9 \pm 5.6$  Ma on Brooklyn Diorite. P71392 was collected from the outcrop sampled by Muir et al. (1996a) which is ~600 m from surface exposures of an Early Cretaceous phase of the Median Batholith. OU49215 is ~1200m from this Cretaceous pluton.

The Victoria Range segment of the Karamea Batholith (Tulloch, 1979; Rattenbury, 1998) comprises the lower plate of a metamorphic core complex (Tulloch and Challis, 2000) and all rocks yield Mesozoic K-Ar ages. Dated plutons include Crosscut, Tarn Summit, Tobin and Maruia, all of which tend to have granular-polygonal textures and weak-absent zoning in plagioclase.

*Tarn Summit Pluton granodiorite* is from coarse-grained biotite-rich granodiorite-tonalite orthogneiss covering ~60km<sup>2</sup> in the central Victoria Range.

*Maruia Pluton granodiorite* comprises biotite-rich granodiorite petrographically similar to Tarn Summit Orthogneiss. The N-S elongate pluton includes abundant metasedimentary inclusions and minor intrusions whose compositions range from diorite to granite.

*Tobin Pluton quartz diorite* is one of several small hornblende-biotite-(quartz) dioritic plutons up to ~2 km<sup>2</sup> in the Victoria Range. The dated pluton intrudes Tarn Summit Orthogneiss and its eastern margin lies within 500m of a large Early Cretaceous granodiorite intrusion. It includes tonalitic schlieren apparently derived from Tarn Summit Orthogneiss.

*Barrytown Granite* (Tulloch and Brathwaite, 1986; Laird, 1988, Nathan et al., 2002) is a ~4km<sup>2</sup> pluton of medium grained mostly equigranular biotite granite, zoned (Tulloch, 1986) from a biotite rich rim (sample P45613) to a biotite-poor core (samples P45412, P66549, UC6762 and KF190201-10 are all from the same outcrop at the main road crossing of Granite Creek). *Falls Creek Granite* is similar granite to Barrytown Granite.

*Rangitoto granite* (Jury, 1981; Cox and Barrell, 2007) is a medium-coarse grained equigranular biotite granite. Barrytown, Falls and Rangitoto plutons all intrude low-grade Greenland Group metasediments.

*Kakapotahi granite* (Jury, 1981; Cox and Barrell, 2007) is a two-mica medium grained granite containing accessory garnet, fluorite, monazite and xenotime.

*Paringa granodiorite* forms a ~5 km<sup>2</sup> pluton near the southern end of the Nelson block in south Westland (Mortimer et al., 1984). The hornblende-green biotite granodiorite contains fine grained enclaves of similar mineralogy and is cut by late stage leucogranite dykes. Biotite from the pluton yielded a K-Ar age of 286 Ma (Hurley et al., 1962).

### **Fiordland Block**

*Horatio Pluton* (Allibone et al. 2009) forms part of the ~80km<sup>2</sup> Seaforth Orthogneiss body of gneissic tonalite-granite in southeastern Fiordland (Gibson, 1982). The medium grained sample dated from Mt Bain comprises gneissic garnetiferous biotite granodiorite.

*Dolphin diorite* dominates lithologies within the ~30 km<sup>2</sup> Dolphin Intrusive Complex (Ward, 1984), east of the Takaka-Buller terrane boundary (Old Quarry Fault) in Dusky Sound, southwest Fiordland.

*Evans Pluton* granite is medium grained muscovite (brown) biotite granite which dominates the N-S trending ~20x5 km Evans Pluton (Allibone et al., 2007). The sample exhibits strong ductile deformation/ribboning of quartz, possibly related to Cretaceous detachment faulting.

*Newton River Pluton* granodiorite is from a ~5x10km coastal exposure of a pluton dominated by coarse-grained K-feldspar megacrystic granodiorite-granite (Allibone et al. 2007). Protomylonitic in places as for nearby Evans Pluton.

*Houeroof Pluton* tonalite (Allibone et al., 2007; Tine Peak Tonalite of Powell, 2006). Coarse grained, massive to weakly foliated; abundant garnet. Abundant zircon and monazite. Other samples may contain hornblende ± clinopyroxene.

*Tower Intrusives* comprises 2 N-S trending ~6x1.5km plutons in southern Fiordland. Coarse grained hornblende, clinopyroxene quartz diorite is characterised by abundant garnet (Allibone et al., 2007).

*Poteriteri Pluton* is ~80km<sup>2</sup> pluton of A-type granite in the southern Princes Mountains (Allibone et al. 2009) comprised largely of granite characterised by abundant large squat zircon crystals.

*Alice Pluton diorite* forms small bodies within the Poteriteri Pluton in the southern Princes Mountains (Allibone et al., 2009).

*Big Pluton granite (previously Kakapo Granite)*. An ~20x15 km pluton on the southern coast. Dominantly granodiorite-granite, minor tonalite. Coarse grained, generally massive, and equigranular-inequigranular, but locally foliated. Accessory garnet, ilmenite, titanite in addition to Ap, Zrn. Intrudes Takaka-Buller Terrane boundary (Allibone et al. 2007).

*Ridge Suite granite* dike is 3m wide and intrudes Early Paleozoic metasedimentary rocks of Takaka Terrane, north of Big pluton (Allibone et al. 2007).

### **Stewart Island**

*Ruggedy Granite* is a coarse grained granite extending over a ~ 25x5km belt in northwest Stewart Island (Allibone and Tulloch, 2004). No country rocks are unambiguously

recognised (cf. Allibone, 1991). The homogeneous, generally massive and weakly altered granite contains minor clots of green+brown biotite.

*Freds Camp Pluton* alkali-feldspar granite forms part of several small plutons up to 5x2km within a 30km belt in northeastern Stewart Island (Allibone and Tulloch, 2004). It is extensively intruded by, and faulted against, Mesozoic granites. In the dated sample feldspar is dusty mesoperthite, albite occurs only as blebby grains along K-feldspar rims. Secondary biotite forms clots and some varieties contain blue amphibole and pyroxene.

*Ridge tonalite*, *Table granite* and *Knob granite* (Allibone & Tulloch, 1997, 2004) are from gneissic plutons that intrude Pegasus Group metasedimentary rocks of the Takaka Terrane in central Stewart Island. Ridge tonalite is a ~30x1-5 km body of medium-coarse grained inequigranular biotite-rich granodiorite in central Stewart Island. Table granite is a 30 x 1 km sheet of leucogranite intercalated with Ridge tonalite. Knob Granite is from a 10x15 km pluton which is largely surrounded by Early Cretaceous plutons. The dated sample is a coarse-grained muscovite-biotite granite with a ductile fabric of probable Cretaceous age.

## ANALYTICAL METHODS

### U-Pb laboratory procedures

Zircon, monazite and titanite were separated from the rock samples by standard crushing, heavy liquid, and magnetic separation techniques, and were subsequently hand-picked under a binocular microscope based on clarity and crystal morphology. U-Pb analyses were carried out in three laboratories in the course of this study; San Diego State University, GNS Science (New Zealand) in association with Brown University and, most recently, Massachusetts Institute of Technology (MIT) (Table 2).

Initial analyses were undertaken at the San Diego State University following methods modified from Krogh (1973), using a mixed  $^{208}\text{Pb}$ - $^{235}\text{U}$  spike and isotopic measurements made on a VG Sector 54 variable multicollector thermal ionization mass spectrometer equipped with a Daly ion counting system for detection of  $^{204}\text{Pb}$  (e.g., Kimbrough et al., 1992; 1994). Multi-grain zircon fractions typically weighing 1 to 3 mg were hand picked from mineral separates which had been rinsed with 6.2N HCl and 8N  $\text{HNO}_3$ . Some zircon fractions were further treated with a mixed HF and  $\text{HNO}_3$  solution at ~80°C for 6 to 48 hours in an attempt to remove metamict crystal zones which may have suffered Pb loss (Mattinson, 1994). Replicate analyses of standard zircon OU49127 suggest that typical  $^{206}\text{U}/^{238}\text{U}$  errors of  $\sim \pm 0.3\%$ , as well as the  $^{207}\text{Pb}/^{206}\text{Pb}$  errors, calculated using the PBDAT program (Ludwig, 1989) are realistic estimates.

Subsequently, many samples were further analyzed using a spike solution that included  $^{205}\text{Pb}$  in order to allow multiple or single grain analyses. Fractions of about 5 to 50 zircon grains were air-abraded (Krogh, 1982) and/or acid-leached prior to dissolution in the GNS/Otago University laboratory in Dunedin by N. Walker utilising a mixed  $^{205}\text{Pb}$ - $^{235}\text{U}$ -

$^{233}\text{U}$  spike. Isotopic measurements were subsequently made by Walker on a Finigan MAT 261 mass spectrometer at Brown University (Getty and Gromet, 1992). Samples analysed at MIT with few exceptions were single zircon grains. In order to minimize the effects of Pb loss, the grains were pre-treated in one of two ways; conventional mechanical air-abrasion (Krogh, 1982) followed by fluxing in 4N  $\text{HNO}_3$  at 80° C, or a version of the thermal annealing and acid leaching (also known as chemical abrasion or CA-TIMS) technique of Mattinson (2005), prior to addition of a mixed  $^{205}\text{Pb}$ - $^{233}\text{U}$ - $^{235}\text{U}$  tracer solution and complete dissolution. Details of zircon pre-treatment, dissolution and U and Pb chemical extraction procedures are described in Ramezani et al. (2007). Pb and U were loaded together onto a single degassed Re filament in a silica-gel/phosphoric acid mixture (Gerstenberger and Haase, 1997) and their isotopic compositions were measured on a VG Sector 54 thermal ionization mass spectrometer. Pb isotopes were measured by peak-hopping using a single Daly photomultiplier detector and U isotopic measurements were made in static mode using multiple Faraday collectors. Mass fractionation for Daly measurements was determined to be  $0.25 \pm 0.04\%$ /amu over a wide temperature range based on long-term measurements of the NBS-981 Pb standard. U mass fractionation was calculated in real-time using a double spike. All common Pb was attributed to procedural blank. Data reduction, age calculation, and generation of concordia plots were carried out using the algorithms of Ludwig (1980), and the statistical reduction and plotting program ISOPLOT (Ludwig, 2005).

### **U-Pb data interpretation and error treatment**

The U-Pb data presented in this paper were collected in three different laboratories over a period of 16 years, and thus are considerably variable in terms of implemented analytical protocols and precisions of the corresponding data. Our most recent results were produced at MIT and involve analyses of single zircon grains with total radiogenic Pb contents of as little as 3 pg and internal uncertainties of measured dates in the order of 0.1% or better. Furthermore, the application of the CA-TIMS method (Mattinson, 2005) has significantly enhanced the accuracy of U-Pb dates by selectively removing zircon crystal zones prone to radiation damage and Pb loss.

With improved analytical precision, however, additional sources of error that were previously deemed negligible have become significant and must be taken into account. It has now become evident that at high precision even statistically coherent and highly reproducible sets of zircon U-Pb data exhibit slight age discordance manifested by  $^{207}\text{Pb}/^{206}\text{Pb}$  dates that are ~0.2% older than the associated Pb/U dates. This discordance is likely due to imprecision in one or both of the U decay constants (Mattinson, 2000; Schoene et al., 2006) rather than open system behaviour in zircon, and thus limits the application of age concordance (e.g., “Concordia age” of Ludwig, 1998) in the assessment of high-precision U-Pb data. This source of systematic uncertainty is particularly important when isotopic dates measured from different chronometers (e.g., U-Pb and  $^{40}\text{Ar}/^{39}\text{Ar}$ ) are compared. Another systematic uncertainty of significance is the spike calibration error that must be accounted for when comparison is made between high-precision U-Pb dates produced in different laboratories (i.e., using different spike solutions).

The interpretation of magmatic crystallization ages from U-Pb data involves the choice between multiple isotopic dates, including the  $^{206}\text{Pb}/^{238}\text{U}$ ,  $^{207}\text{Pb}/^{206}\text{Pb}$  and concordia intercept dates. In general, results from a single, inheritance-free, population of zircons for which Pb loss is non-existent or has been eliminated is represented by a coherent cluster of data (termed “equivalent” by Ludwig, 1998), in which all scatter can be accounted for by analytical uncertainty. In these cases the weighted mean  $^{206}\text{Pb}/^{238}\text{U}$  date of the cluster is considered the most precise and accurate representation of crystallization age. When coherent data sets are not obtainable due to persistent Pb loss that is inferred to have occurred in geologically recent time, we instead rely on the  $^{207}\text{Pb}/^{206}\text{Pb}$  date as the best estimate of the crystallization age. In this case, uncertainties in the decay constants can be generally ignored. If the condition of young-age Pb loss (i.e., lower concordia intercept close to zero) is not satisfied, or zircon inheritance is involved, estimation of the crystallization age will inevitably rely upon the concordia intercept dates. It must be noted that for rocks of Phanerozoic age, the  $^{206}\text{Pb}/^{238}\text{U}$  date is the most sensitive indicator of open-system behaviour (Pb loss and/or inheritance) in zircon.

In order to demonstrate all relevant sources of uncertainty the U-Pb date errors are reported as follows:  $\pm X(Y)[Z]$  (Table 2), where X is the internal uncertainty in absence of all systematic error (tracer calibration and decay constants), Y includes the tracer calibration error (using a conservative estimate of the  $2\sigma$  standard deviation of the Pb/U ratio in the tracer to be 0.05%), and Z includes the tracer calibration as well as decay constant errors of Jaffey et al. (1971) (external uncertainty). For  $^{207}\text{Pb}/^{206}\text{Pb}$  dates, tracer errors are negligible and Y is not reported (so it reads  $\pm X[Z]$ ). The MSWD (mean square of the weighted deviates: York, 1967, 1969) of the  $^{206}\text{Pb}/^{238}\text{U}$  weighted mean date is calculated prior to the addition of systematic uncertainties. For the purpose of calculating the duration between two U-Pb ages, we ignore the systematic errors associated with U decay constants as they cancel out (e.g. Bowring et al. 2007). Conservatively, we incorporate the spike U/Pb calibration for durations between samples, including those analysed in the same laboratory.

### Oxygen isotopes

Quartz is much less susceptible to alteration than other rock-forming granite minerals and provides a more robust guide to the oxygen isotope ratio of the original magma than whole rock  $^{18}\text{O}/^{16}\text{O}$  ratios (Harris et al., 1997). The  $\delta^{18}\text{O}$  value for the original magma ( $\delta^{18}\text{O}_{\text{magma}}$ ) can be estimated from the  $\delta^{18}\text{O}$  value of the quartz. The  $\delta^{18}\text{O}$  value of quartz in a granite is dependent on the isotope fractionation between quartz and the melt ( $\Delta_{\text{qtz-magma}}$ ) and also the cooling rate, which is reflected in the grain-size, and the temperature of closure of the quartz to oxygen diffusion (e.g. Gilotti 1986). To correct for the “closure” effects  $\Delta_{\text{qtz-magma}}$  for quartz porphyries are assumed to be +1‰ and for coarse-grained granites  $\leq 2\%$  (Gilotti, 1986; Taylor, 1986). The granites in this study are typically medium grained and so a  $\Delta_{\text{qtz-magma}}$  of +1.5‰ is assumed.

Quartz separates were obtained by hand picking using a binocular microscope. In some cases etching of picked minerals by HF vapour was done to ensure purity of quartz. Oxygen was extracted from quartz using laser ablation and  $\text{BrF}_5$  reagent similar to the

procedure described by Sharp (1990). Isotope ratios were determined using a NAA mass spectrometer at GNS Science. The data are reported in the familiar  $\delta$  notation relative to V-SMOW. Four splits of NBS-28 quartz were run with each batch of 17 quartz samples analysed by laser ablation. Raw sample data were normalised to NBS-28 using a value of 9.64‰ (Coplen, 1983). The average difference between four sets of NBS-28 quartz analyses is 0.16‰.

## U-Pb GEOCHRONOLOGIC RESULTS

Samples are discussed in approximate north to south order within western New Zealand (Table DR1). Most monazite analyses reported here display either reverse discordance due to non-equilibrium incorporation of  $^{230}\text{Th}$ , and/or significant spread in U-Pb dates due to complex internal age zonation of the monazite grains. Hence ages based exclusively on monazite are of lesser reliability. In general, where sufficient data were not available for calculation of reliable ages, an age approximation has been made (e.g., ~349 Ma), without associated uncertainties, to serve as an indication of possible emplacement age. Caution must be exercised in any interpretation of these approximate ages. In the following discussion of results, interpreted ages have been reported with their total uncertainty incorporating all sources of internal and external error (Z); full error assessment, including a breakdown of various sources of error are given in Table 2. Sample collections: P, PETLAB database (GNS Science, <http://pet.gns.cri.nz/>); OU, Otago University, Geology Dept.

### Nelson Block

*Oparara granite, OU50090.* All five single-grain zircon CA-TIMS analyses are concordant with uncertainties, though two slightly younger grains probably indicate some degree of Pb loss. The coherent cluster of three older analyses yields a weighted mean  $^{206}\text{Pb}/^{238}\text{U}$  date of  $370.10 \pm 0.67$  Ma (MSWD = 0.67), which overlaps within error with the weighted mean  $^{207}\text{Pb}/^{206}\text{Pb}$  date of all five analyses ( $371.50 \pm 0.94$  Ma, MSWD = 0.33).

*Flanagan quartz diorite, P45423.* Two near-concordant multigrain fractions and one near concordant single grain, and one highly discordant, multi-grain, zircon fraction are interpreted as an inheritance discordia with a lower intercept date of  $346.9 \pm 1.8$  Ma (MSWD = 1.6). Alternatively, the weighted mean  $^{206}\text{Pb}/^{238}\text{U}$  date of the three near-concordant fractions will be  $351.6 \pm 2.1$  Ma (MSWD = 3.5). However, because of non-negligible scatter in data and discordance, the lower intercept date provides a more meaningful estimate for the crystallization age. The possibility that the three near-concordant fractions are discordant due to Pb-loss is considered unlikely because of the lack of dispersion towards the origin, especially as two of three near concordant fractions were either leached or abraded.

*Domett granite, OU50087.* Three out of four analyzed multi-grain zircon fractions, including one concordant fraction ( $>74 \mu\text{m}$ ), yielded  $^{207}\text{Pb}/^{206}\text{Pb}$  dates that overlap within uncertainty and yield a weighted mean date of  $363.1 \pm 5.3$  Ma (MSWD = 5.2). This date

overlaps within error with the  $^{206}\text{Pb}/^{238}\text{U}$  date of the concordant fraction ( $361.2 \pm 1.0$  Ma) and serves as the best estimate for the pluton crystallisation age.

*Richmond Hill granite, P40375.* A coherent cluster of three single-zircon CA-TIMS analyses produced a weighted mean  $^{206}\text{Pb}/^{238}\text{U}$  age of  $361.48 \pm 0.76$  Ma (MSWD = 1.6). A multigrain zircon analysis was highly discordant and younger, but with a comparable  $^{207}\text{Pb}/^{206}\text{Pb}$  date (360.8 Ma) indicating Pb loss.

*Riwaka Complex.* Two samples from the Brooklyn Diorite have been analyzed. Sample OU49215 was collected 3.1 km SSW of sample P71392. The latter is from an outcrop previously sampled and dated by *in situ* ion microprobe (SHRIMP) U-Pb method (Muir et al., 1996a). These outcrops are located about 1200m and 600m, respectively, from surface exposures of Early Cretaceous plutons in the Median Batholith (Grindley, 1978). Both samples show considerable dispersion in zircon U-Pb dates, but with  $^{207}\text{Pb}/^{206}\text{Pb}$  dates that overlap within uncertainty, indicating variable and persistent Pb loss. For OU49215 the combined weighted mean  $^{207}\text{Pb}/^{206}\text{Pb}$  age of three multi-grain fractions and three GNS single-grain analyses (excluding two reversely discordant analyses) is  $364.0 \pm 1.1$  Ma (MSWD = 1.15). Single zircon grains from sample P71392 were treated by the CA-TIMS technique, except for analysis z9 that was carried out without any pre-treatment. The oldest single-zircon yields a  $^{206}\text{Pb}/^{238}\text{U}$  date of 364.5 Ma which we consider the minimum age for zircon crystallization. Regression of all analyses excluding z1 yields an upper concordia intercept age of  $366.5 \pm 2.9$  Ma (MSWD = 0.04). The weighted mean  $^{207}\text{Pb}/^{206}\text{Pb}$  age of the same group of analyses is  $366.3 \pm 1.1$  Ma (MSWD = 0.04), which is considered to be the best estimate for the age of the rock. All ages for both samples overlap within uncertainties.

*Foulwind Granite, OU49201.* Four air-abraded zircon and two monazite single crystal analyses produced concordant to near concordant dates between 311 Ma and 319 Ma. Scatter in data in excess of the analytical errors prohibits any reliable age calculation, although the two oldest analyses (z3 and Mz1) alone yield a weighted mean  $^{206}\text{Pb}/^{238}\text{U}$  age of  $319.26 \pm 0.59$  Ma (MSWD = 0.9). We therefore report only an approximate age of ~319 Ma for this intrusion. Younger analyses may reflect a protracted crystallization history or Pb-loss. A multi-grain fraction of coarse zircons yielded a significantly older and discordant date indicating inheritance from a significantly older source. The above date is roughly 8 Ma (2.5%) younger than a SL-13 calibrated SHRIMP age (Muir et al., 1994). Because SL-13 tends to yield ages too young by an average of -1% (Black et al. 2003) the error is likely to be due to beam overlap on inherited cores.

*Crosscut Granite, P52241.* Two concordant and one older, discordant, single-zircon analyses (air-abraded) yield a lower intercept age of  $368.43 \pm 0.69$  Ma (MSWD = 1.4) and suggest inheritance from a significantly older (Precambrian?) source. Two analyzed monazite fractions have large uncertainties, are reversely discordant and are not suitable for age calculation. Thus, the lower intercept date best represents the pluton emplacement age.



*Tarn Summit Tonalite, OU49209.* Three air-abraded single zircons and one multi-grain zircon fraction are variably discordant, but fall on a discordia line with a high probability of fit giving a lower concordia intercept date of  $369.3 \pm 1.8$  Ma (MSWD = 0.3) and an upper intercept of  $\sim 1186$  Ma. A single monazite multigrain fraction with a  $^{206}\text{Pb}/^{238}\text{U}$  age of  $\sim 348$  Ma is interpreted to reflect a young (Early Cretaceous?) overprint event.

*Maruia Granodiorite, P52247.* The only analyzed multi-grain zircon fraction (180  $\mu\text{m}$ , L:B 5:1) from this sample is concordant within error, and a pluton crystallisation age of  $\sim 345$  Ma has been estimated based on its  $^{206}\text{Pb}/^{238}\text{U}$  date.

*Tobin quartz-diorite.* Four multi-grain zircon fractions from this sample range from concordant to near-concordant. Excluding one analysis with large uncertainty in U-Pb dates, the weighted mean  $^{207}\text{Pb}/^{206}\text{Pb}$  date of the remaining analyses will be  $349.7 \pm 1.5$  Ma (MSWD = 0.56).

*Barrytown Granite, P45412.* Both inheritance and Pb loss are manifested in the five single-zircon analyses from this sample. However, a coherent cluster of three concordant CA-TIMS analyses yield a weighted mean  $^{206}\text{Pb}/^{238}\text{U}$  age of  $368.27 \pm 0.57$  Ma (MSWD = 0.37). A multi-grain monazite  $^{207}\text{Pb}/^{235}\text{U}$  date of  $367.0 \pm 3.6$  Ma overlaps with the zircon age, as does a biotite K-Ar age of  $373 \pm 5$  Ma (Nathan et al., 2000) and an ion probe U-Pb age of  $372.4 \pm 5.1$  Ma (Muir et al., 1996a).

*Falls Creek granite, P45587.* Two multi-grain zircon fractions from this sample were variably discordant and different in age. Assuming inheritance as the main source of age discrepancy, a lower concordia intercept date of  $\sim 373$  Ma can be hypothesized. Two monazite fractions overlap within error but are reversely discordant, indicating the occurrence of excess  $^{206}\text{Pb}$  as a result of disequilibrium incorporation of  $^{230}\text{Th}$  into monazite. Thus, the  $^{206}\text{Pb}/^{238}\text{U}$  dates are not geologically meaningful. In this case, the weighted mean  $^{207}\text{Pb}/^{235}\text{U}$  age of the monazite analyses ( $377.3 \pm 0.8$  Ma) may provide a good estimate for the crystallization age (e.g., Scharer, 1984). We report an approximate pluton age of  $\sim 375$  Ma based on combined zircon and monazite data.

*Kakapotahi granite, P52283.* Two monazite fractions overlap in age within uncertainty, but are reversely discordant. As in the case of Falls Creek granite (see above), the weighted mean  $^{207}\text{Pb}/^{235}\text{U}$  age of  $\sim 376$  Ma provides only an approximation for the pluton crystallization age.

*Rangitoto granite, P52355.* Seven single-zircon (3 air-abraded and 4 CA-TIMS) analyses from this sample are all concordant within uncertainty, but range in  $^{206}\text{Pb}/^{238}\text{U}$  dates from 368.5 Ma to 370.4 Ma. Age comparison between the air-abraded analyses and the CA-TIMS ones clearly indicates Pb loss that has been more efficiently removed by the annealing-leaching technique. The weighted average  $^{206}\text{Pb}/^{238}\text{U}$  date of the three oldest CA-TIMS zircons is  $370.04 \pm 0.61$  Ma (MSWD = 0.9), which best represents the granite crystallization age.

*Paringa granodiorite, OU50100.* Five single-zircon CA-TIMS analyses form a coherent cluster with a weighted mean  $^{206}\text{Pb}/^{238}\text{U}$  age of  $369.41 \pm 0.69$  Ma (MSWD = 1.6), which we report as the crystallisation age. The only air-abraded single zircon is distinctly younger indicating the relative inefficiency of the air abrasion technique in removing Pb loss. A multigrain titanite analysis from this sample is distinguishably younger but with a comparable  $^{206}\text{Pb}/^{207}\text{Pb}$  age of  $\sim 367.9$  Ma, suggesting minor Pb loss.

### **Fiordland Block**

*Horatio Pluton, OU49111.* A single-zircon analysis from this sample is concordant within uncertainty, whereas a multi-grain fraction is discordant and distinctly younger, though with a comparable  $^{207}\text{Pb}/^{206}\text{Pb}$  date. Assuming Pb loss as the only source of scatter, the weighted mean  $^{206}\text{Pb}/^{207}\text{Pb}$  age of  $352.8 \pm 2.0$  Ma (MSWD = 0.12) is considered the best estimate of the crystallisation age of this rock.

*Dolphin diorite, OU49115.* Three multi-grain zircon fractions overlap in age within error, one of which is a distinctly younger and less precise analysis. The weighted mean  $^{206}\text{Pb}/^{238}\text{U}$  age of the two older analyses would yield  $362.0 \pm 1.2$  Ma (MSWD = 0.24), although there is not sufficient data to support this calculated age. Alternatively, if zircon inheritance is invoked, regression of the three analyses would yield a lower intercept date of  $360.7 \pm 2.1$  Ma (upper intercept:  $1095 \pm 590$  Ma) with an MSWD of 2.0. The latter provides a more reliable estimate for the crystallization age of the rock.

*Evans granite P78948* (Note: renumbered from OU49226 due to double booking of latter number). Two (near-) concordant single-zircon and one highly discordant multi-grain analyses from this sample define a discordia with a lower intercept age of  $349.4 \pm 1.4$  Ma (MSWD = 0.84). This age is consistent with the  $^{206}\text{Pb}/^{238}\text{U}$  date of the most concordant analysis (349.5 Ma), and provides the best estimate for the crystallization age.

*Newton River granodiorite, P64999.* Both single-zircon analyses from this rock are discordant and do not overlap, except for their  $^{207}\text{Pb}/^{206}\text{Pb}$  dates that yield an imprecise weighted mean date of  $349 \pm 10$  Ma (MSWD = 3.0). Assuming recent Pb loss to be the cause of discordance, an approximate age of  $\sim 349$  Ma can be inferred for this rock.

*Houserroof tonalite, OU58012.* Two analyses of multigrain monazite fractions are reversely discordant and only partially overlap, thus not suitable for age calculation. Based on their  $^{207}\text{Pb}/^{235}\text{U}$  dates alone (least affected by disequilibrium incorporation of  $^{230}\text{Th}$  in monazite), an approximate age of  $\sim 349$  Ma is considered for this rock.

*Tower Pluton diorite, P73425.* The only available analysis from this rock (single-zircon, CA-TIMS) was concordant with a  $^{206}\text{Pb}/^{238}\text{U}$  date of  $350.8 \pm 0.25$  Ma. In the absence of reproducible data, an approximate crystallization age of  $\sim 351$  Ma is inferred.

*Poteriteri Pluton granite, P74751.* Three near-concordant single-zircon CA-TIMS analyses from this sample display slight discordance that is positively correlated with age. Regression of all three analyses to a discordia line yields a lower intercept date of

$328.7 \pm 1.8$  Ma (MSWD = 0.11 Ma) which is interpreted as the best estimate for the crystallization age.

*Alice diorite, P74756.* The crystallization age of this rock is reliably represented by three concordant single-zircon CA-TIMS analyses that overlap in age and constitute a coherent cluster with a weighted mean  $^{206}\text{Pb}/^{238}\text{U}$  date of  $340.89 \pm 0.65$  Ma (MSWD = 0.24).

*Big granite, P70787.* Six single-zircon CA-TIMS analyses from this rock overlap within error and yield a weighted mean  $^{206}\text{Pb}/^{238}\text{U}$  date of  $354.42 \pm 0.21$  Ma, with a large MSWD of 4.3. This indicates a geologically significant scatter in the data, probably due to slight inheritance or Pb loss. Excluding the oldest analysis (z4) as an outlier (affected by inheritance), the remaining five analyses give a more statistically valid weighted mean date of  $354.35 \pm 0.58$  Ma (MSWD = 1.3). The sixth analysis has a slightly older  $^{206}\text{Pb}/^{238}\text{U}$  age of 354.8 Ma suggestive of a trace of the inheritance. The latter probably explains older *in situ* (SHRIMP) U-Pb ages obtained by Muir et al. (1998).

*Ridge Suite granite dike, P71266.* Two single-zircon CA-TIMS analyses do not overlap, with one displaying reverse discordance. No reliable age can be calculated. However, based on the  $^{207}\text{Pb}/^{206}\text{Pb}$  dates of the available analyses and the assumption of Pb loss, an approximate age of ~351 Ma is inferred for this rock.

*George Sound granites.* Bradshaw and Kimbrough (1991) reported a mid-Paleozoic age for mainly A-type granitoid enclaves within Early Cretaceous Western Fiordland Orthogneiss at George Sound. We note that five of six (excluding OU 51837)  $^{207}\text{Pb}/^{206}\text{Pb}$  ages are close to 310 Ma, which we consider a more likely emplacement age for these three rocks.

### **Stewart Island**

*Ruggedy Granite, P62175.* Two single-zircon analyses overlap within error and are concordant, with a weighted mean  $^{206}\text{Pb}/^{238}\text{U}$  date of ~342 Ma. Three multi-grain zircon analyses from this sample gave younger  $^{206}\text{Pb}/^{238}\text{U}$  dates (333.2 to 335.5 Ma) but  $^{207}\text{Pb}/^{206}\text{Pb}$  dates that overlap with those of single-grain analyses. The weighted mean  $^{207}\text{Pb}/^{206}\text{Pb}$  date of all five analyses is  $341.5 \pm 4.2$  Ma (MSWD = 0.21), which provides the best estimate for crystallization age of the granite.

*Freds Camp Alkali-feldspar granite, P57426.* Four single-zircon CA-TIMS analyses define a coherent cluster with a weighted mean  $^{206}\text{Pb}/^{238}\text{U}$  date of  $305.69 \pm 0.50$  Ma (MSWD = 1.13). A three-grain zircon analysis from another sample of this pluton (P58515) is discordant indicating significant Pb-loss, but its  $^{207}\text{Pb}/^{206}\text{Pb}$  date of  $307.6 \pm 0.9$  Ma is in perfect agreement with the  $^{207}\text{Pb}/^{206}\text{Pb}$  dates of the four single analyses.

*Ridge tonalite, P57323.* The single-zircon (3 abraded and 2 CA-TIMS) analyses of this sample are mostly plagued by inheritance from variable old-age sources. However, the two youngest data points combined with a multi-grain zircon analysis fall on a discordia with a lower intercept date of  $345.2 \pm 5.0$  Ma (MSWD = 1.2), which we interpret as the magmatic crystallization age.

*Table granite, P60678.* The only two single-zircon analyses from this sample are variably discordant and different in age. Assuming a simple Pb loss model, a hypothetical discordia line passing through the analyses would yield an upper intercept date of ~340 Ma, which we infer as an approximation for the crystallization age. The lower intercept age of ~126 Ma is consistent with the subsequent intrusion and enclosure of this unit by several Early Cretaceous plutons (Allibone and Tulloch, 2004).

*Knob Granite, P63648.* A single-grain and a multi-grain monazite fraction have comparable  $^{207}\text{Pb}/^{206}\text{Pb}$  dates with a weighted mean date of  $305 \pm 2$  Ma. Considering the possibility of presence of excess  $^{206}\text{Pb}$  in monazite due to Th disequilibrium effects, this should be considered a minimum age for Knob Granite crystallisation. A hypothetical discordia line anchored at 80 Ma, the age of ductile deformation of this rock (timing of monazite recrystallisation and/or Pb loss) within the Sisters Shear Zone (Kula et al., 2007), would yield an upper intercept date of  $316.6 \pm 6.2$  Ma.

### Marie Byrd Land - S-type granites in West Antarctica

New Zealand and West Antarctica formed contiguous sectors within the Pacific margin of Gondwana prior to Late Cretaceous breakup (e.g., Eagles et al., 2004). Monazite  $^{207}\text{Pb}/^{235}\text{U}$  ages from two samples from West Antarctica suggest minimum ages of ~351 and 359 Ma for 2-mica granites from Neptune Nunatak and the Chester Mountains, respectively (Fig. DR1).

*Chester Mountains.* Two monazite fractions are reversely discordant. The oldest fraction has a  $^{207}\text{Pb}/^{235}\text{U}$  age of  $359.1 \pm 1.6$  Ma and we report ~359 Ma as a minimum pluton crystallisation age.

*Neptune Nunatak.* Two monazite fractions exhibit normal discordance with an upper intercept age of  $351 \pm 16$  Ma from which we report ~351 Ma as a minimum pluton crystallisation age.

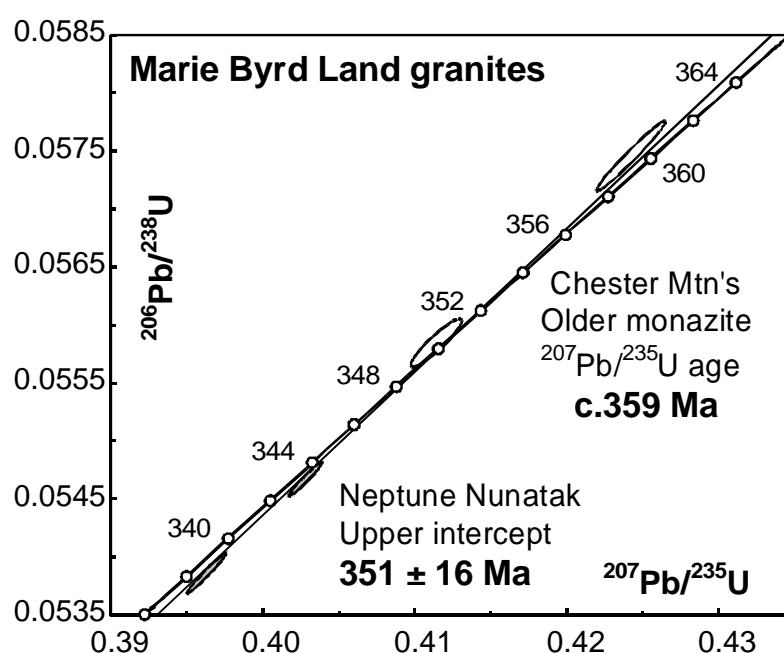

Fig. DR1. Monazite U-Pb ages from the Chester Mountains and Neptune Nunatak of Marie Byrd Land.

## DISCUSSION OF S-TYPE CHARACTER OF KARAMEA SUITE

Muir et al. (1996b) confused the batholith-suite concepts outlined by Tulloch (1988) when they misquoted Cooper and Tulloch (1992): “.... the Karamea *Batholith* (sic) .... is distinctly S-type in character”. Muir et al. also noted that some samples (from the Karamea Batholith) were ambiguous in terms of the I-S granite classification with respect to Chappell and White (1974, 1992) criteria such as ASI, Sri etc. However, Muir et al.’s samples have lower ASI indices for plutons common to both sample sets (e.g., Muir et al., 1996b Barrytown sample BA has a lower ASI index than all 12 of our Barrytown analyses), and their samples extend to somewhat higher Na (and thus possibly a higher ASI index) than our set. One explanation for the difference may be due to their analysis of undated samples that may be of very different age (e.g., Britannia Granite, some of which is Cretaceous; O’Sullivan’s Granite sample RNZ 271). Regardless, none of Muir’s samples (excluding RNZ 271 and the mafic rocks of the Riwaka Complex and Mt Zetland) have ASI indices less than Chappell and Whites (1992) S-type boundary of value of 1.056. Nor are any of Muir’s initial  $^{87}\text{Sr}/^{86}\text{Sr}$  values less than the (Lachlan) S-type field when they are recalculated at 370 Ma (cf. 380, not 375 Ma), yielding initial Sr values higher by ~ 0.001-0.002 than reported (see Fig 12).

## REFERENCES CITED

- Allibone, A. H., 1991, Volcanogenic and granitoid rocks from Northwest Stewart Island: New Zealand Journal of Geology and Geophysics, v. 34, no. 1, p. 35-50.
- Allibone, A. H., and Tulloch, A. J., 1997, Metasedimentary, granitoid, and gabbroic rocks from central Stewart Island, New Zealand: New Zealand Journal of Geology and Geophysics, v. 40, no. 1, p. 53-68.
- , 2004, Geology of the plutonic basement rocks of Stewart Island, New Zealand: New Zealand Journal of Geology and Geophysics, v. 47, no. 2, p. 233-256.
- Allibone, A. H., Turnbull, I. M., Tulloch, A. J., and Cooper, A. F., 2007, Plutonic rocks of the Median Batholith in southwest Fiordland, New Zealand: field relations, geochemistry, and correlation: New Zealand Journal of Geology and Geophysics, v. 50, no. 4, p. 283–314.
- , 1968, Regional geochronology of New Zealand: Geochimica et Cosmochimica Acta, v. 32, no. 7, p. 669-697.
- Black, L. P., Kamo, S. L., Williams, I. S., Mundil, R., Davis, D. W., Korsch, R. J., and Foudoulis, C., 2003, The application of SHRIMP to Phanerozoic geochronology; a critical appraisal of four zircon standards: Chemical Geology, v. 200, no. 1-2, p. 171-188.
- Bowring, S. A., Grotzinger, J. P., Condon, D. J., Ramezani, J., Newall, M., and Allen, P. A., 2007, Geochronologic constraints of the chronostratigraphic framework of the Neoproterozoic Huqf Supergroup, Sultanate of Oman: American Journal of Science, v. 307, no. 10, p. 1097-1145.

- Bradshaw, J. D., and Kimbrough, D. L., 1991, Mid-Paleozoic age of granitoids in enclaves within Early Cretaceous granulites, Fiordland, southwest New Zealand: *New Zealand Journal of Geology and Geophysics*, v. 34, no. 4, p. 455-469.
- Chappell, B. W., and White, A. J. R., 1974, Two contrasting granite types: *Pacific Geology*, v. 8, Circum-Pacific plutonism, p. 173-174.
- , 1992, I- and S-type granites in the Lachlan fold belt, *in* Brown, P. E., and Chappell, B. W., eds., *The second Hutton symposium on the Origin of granites and related rocks: Special Paper - Geological Society of America: Canberra, Australia*, p. 1-26.
- Cooper, R. A., and Tulloch, A. J., 1992, Early Palaeozoic terranes in New Zealand and their relationship to the Lachlan fold belt: *Tectonophysics*, v. 214, no. 1-4, p. 129-144.
- Coplen, T. B., Kendall, C., and Hopple, J., 1983, Comparison of stable isotope reference samples: *Nature (London)*, v. 302, no. 5905, p. 236-238.
- Cox, S. C., and Barrell, D. J. A., 2007, *Geology of the Aoraki area, QM15: GNS Science, Lower Hutt, New Zealand, scale 1:250,000*.
- Eagles, G., Gohl, K., and Larter, R. D., 2004, High-resolution animated tectonic reconstruction of the South Pacific and West Antarctic margin: *Geochemistry, Geophysics, Geosystems - G<sup>3</sup>*, v. 5, no. 7, p. 21.
- Gerstenberger, H., and Haase, G., 1997, A highly effective emitter substance for mass spectrometric Pb isotope ratio determinations: *Chemical Geology*, v. 136, no. 3-4, p. 309-312.
- Getty, S. R., and Gromet, L. P., 1992, Geochronological constraints on ductile deformation, crustal extension, and doming about a basement-cover boundary, New England Appalachians: *American Journal of Science*, v. 292, no. 6, p. 359-397.
- Gibson, G. M., 1982, Stratigraphy and petrography of some metasediments and associated intrusive rocks from central Fiordland, New Zealand: *New Zealand Journal of Geology and Geophysics*, v. 25, no. 1, p. 21-43.
- Giletti, B. J., 1986, Diffusion effects on oxygen isotope temperatures of slowly cooled igneous and metamorphic rocks: *Earth and Planetary Science Letters*, v. 77, no. 2, p. 218-228.
- Grindley, G. W., 1971, *Geological map of New Zealand; sheet S8, Takaka (ed. 1): Department of Scientific and Industrial Research, Wellington, New Zealand, scale 1:63,360*.
- , 1978, West Nelson, *in* Suggate, R. P., Stevens, G. R., and Te Punga, M. T., eds., *The Geology of New Zealand*, New Zealand Geological Survey, Lower Hutt, New Zealand, p. 96-99.
- Harris, C., Faure, K., Diamond, R. E., and Scheepers, R., 1997, Oxygen and hydrogen isotope geochemistry of S- and I-type granitoids; the Cape Granite Suite, South Africa: *Chemical Geology*, v. 143, no. 1-2, p. 95-114.
- Harrison, T. M., and McDougall, I., 1980, Investigations of an intrusive contact, Northwest Nelson, New Zealand; I, Thermal, chronological and isotopic constraints: *Geochimica et Cosmochimica Acta*, v. 44, no. 12, p. 1985-2004.
- Hurley, P. M., Fairbairn, H. W., Hughes, H., and Pinson, W. H., Jr., 1962, Radiogenic argon and strontium diffusion parameters in biotite at low temperatures obtained

- from Alpine fault uplift in New Zealand: *Geochimica et Cosmochimica Acta*, v. 26, p. 67-80.
- Jaffey, A. H., Flynn, K. F., Glendenin, L. E., Bentley, W. C., and Essling, A. M., 1971, Precision Measurement of Half-Lives and Specific Activities of  $^{235}\text{U}$  and  $^{238}\text{U}$ : *Physical Review C*, v. 4, no. 5, p. 1889-1906.
- Jury, A. P., 1981, Mineralization at Mt Rangitoto and Mt Greenland, Westland [M.Sc. thesis]: University of Canterbury, Christchurch, New Zealand, 124 p.
- Kimbrough, D. L., Mattinson, J. M., Coombs, D. S., Landis, C. A., and Johnston, M. R., 1992, Uranium-lead ages from the Dun Mountain ophiolite belt and Brook Street Terrane, South Island, New Zealand: *Geological Society of America Bulletin*, v. 104, no. 4, p. 429-443.
- Kimbrough, D. L., Tulloch, A. J., Coombs, D. S., Landis, C. A., Johnston, M. R., and Mattinson, J. M., 1994, Uranium-lead zircon ages from the Median Tectonic Zone, South Island, New Zealand: *New Zealand Journal of Geology and Geophysics*, v. 37, no. 4, p. 393-419.
- Krogh, T. E., 1973, A low-contamination method for hydrothermal decomposition of zircon and extraction of U and Pb for isotopic age determinations: *Geochimica et Cosmochimica Acta*, v. 37, no. 3, p. 485-494.
- , 1982, Improved accuracy of U-Pb zircon ages by the creation of more concordant systems using an air abrasion technique: *Geochimica et Cosmochimica Acta*, v. 46, no. 4, p. 637-649.
- Kula, J., Tulloch, A., Spell, T. L., and Wells, M. L., 2007, Two-stage rifting of Zealandia-Australia-Antarctica; evidence from  $^{40}\text{Ar}/^{39}\text{Ar}$  thermochronometry of the Sisters shear zone, Stewart Island, New Zealand: *Geology (Boulder)*, v. 35, no. 5, p. 411-414.
- Laird, M. G., 1988, Geological Map of New Zealand; Sheet S37, Punakaiki: Department of Scientific and Industrial Research, Wellington, New Zealand, scale 1:63,360.
- Ludwig, K.L., 1989, PBDAT for MS-DOS, a computer program for IBM PC compatibles for processing raw U-Th-Pb isotope data, version 1.05, revised April 1989, United States Geological Survey, 88-542 p.
- , 1980, Calculation of uncertainties of U-Pb isotope data: *Earth and Planetary Science Letters*, v. 46, no. 2, p. 212-220.
- , 1998, On the treatment of concordant uranium-lead ages: *Geochimica et Cosmochimica Acta*, v. 62, no. 4, p. 665-676.
- , 2005, Isoplot 3.00; A geochronological toolkit for Microsoft Excel: Berkeley Geochronology Center Special Publication No. 4.
- Mattinson, J. M., 1994, A study of complex discordance in zircons using step-wise dissolution techniques: *Contributions to Mineralogy and Petrology*, v. 116, no. 1-2, p. 117-129.
- , 2000, Revising the “gold standard”—the uranium decay constants of Jaffey et al., 1971.: *Eos, Transactions, American Geophysical Union, Spring Meeting Supplement*, Abstract V61A-02, p. S444-S445.
- , 2005, Zircon U/Pb chemical abrasion (CA-TIMS) method; combined annealing and multi-step partial dissolution analysis for improved precision and accuracy of zircon ages: *Chemical Geology*, v. 220, no. 1-2, p. 47-66.
- Mortimer, G., Nathan, S., Dawson, R. M., and Eggers, M. J., 1984, Geology of the

- lowland area between the Cook and Paringa rivers, South Westland: New Zealand Geological Survey Report 81, 49 pages.
- Muir, R. J., Ireland, T. R., Weaver, S. D., and Bradshaw, J. D., 1994, Ion microprobe U-Pb zircon geochronology of granitic magmatism in the Western Province of the South Island, New Zealand: *Chemical Geology*, v. 113, no. 1-2, p. 171-189.
- , 1996, Ion microprobe dating of Paleozoic granitoids; Devonian magmatism in New Zealand and correlations with Australia and Antarctica: *Chemical Geology*, v. 127, no. 1-3, p. 191-210.
- Muir, R. J., Weaver, S. D., Bradshaw, J. D., Eby, G. N., Evans, J. A., and Ireland, T. R., 1996, Geochemistry of the Karamea Batholith, New Zealand and comparisons with the Lachlan fold belt granites of SE Australia: *Lithos*, v. 39, no. 1-2, p. 1-20.
- Muir, R. J., Ireland, T. R., Weaver, S. D., Bradshaw, J. D., Evans, J. A., Eby, G. N., and Shelley, D., 1998, Geochronology and geochemistry of a Mesozoic magmatic arc system, Fiordland, New Zealand: *Journal of the Geological Society of London*, v. 155, Part 6, p. 1037-1053.
- Nathan, S., 1976, Geological map of New Zealand; Sheets S23/9 and S24/7, Foulwind and Westport: Department of Scientific and Industrial Research, Wellington, New Zealand, scale 1:25,000.
- Nathan, S., Rattenbury, M. S., and Suggate, R. P., 2002, Geology of the Greymouth area: Institute of Geological and Nuclear Sciences, Lower Hutt, New Zealand, scale 1:250,000.
- Nathan, S., Thurlow, C., Warnes, P., and Zucchetto, R., 2000, Geochronology database for New Zealand rocks; 1961-1999: Institute of Geological and Nuclear Sciences Science Report 2000/11, 51 pages.
- Powell, N.G., 2006, The geology of central southern Fiordland, with emphasis on the cause of polybaric Cretaceous metamorphism in western New Zealand [Ph.D. thesis]: University of Otago, Dunedin, New Zealand, 344 p.
- Ramezani, J., Schmitz, M. D., Davydov, V. I., Bowring, S. A., Snyder, W. S., and Northrup, C. J., 2007, High-precision U-Pb zircon age constraints on the Carboniferous-Permian boundary in the southern Urals stratotype: *Earth and Planetary Science Letters*, v. 256, no. 1-2, p. 244-257.
- Rattenbury, M. S., A., C. R., and Johnston, M. R., 1998, Geology of the Nelson area, QM9: Institute of Geological and Nuclear Sciences, Lower Hutt, New Zealand, scale 1:250,000
- Reilly, W. I., 1970, Magnetic Map of New Zealand; Buller, total force anomalies: Department of Scientific and Industrial Research, Wellington, New Zealand, scale 1:250,000.
- Scharer, U., 1984, The effect of initial  $^{230}\text{Th}$  disequilibrium on young U-Pb ages; the Makalu case, Himalaya: *Earth and Planetary Science Letters*, v. 67, no. 2, p. 191-204.
- Schoene, B., Crowley, J. L., Condon, D. J., Schmitz, M. D., and Bowring, S. A., 2006, Reassessing the uranium decay constants for geochronology using ID-TIMS U-Pb data: *Geochimica et Cosmochimica Acta*, v. 70, p. 426-445.
- Sharp, Z. D., 1990, A laser-based microanalytical method for the in situ determination of oxygen isotope ratios of silicates and oxides: *Geochimica et Cosmochimica Acta*, v. 54, no. 5, p. 1353-1357.



- Stacey, J. S., and Kramers, J. D., 1975, Approximation of terrestrial lead isotope evolution by a two-stage model: *Earth and Planetary Science Letters*, v. 26, no. 2, p. 207-221.
- Steiger, R. H., and Jaeger, E., 1977, Subcommittee on geochronology; convention on the use of decay constants in geo- and cosmochemistry: *Earth and Planetary Science Letters*, v. 36, no. 3, p. 359-362.
- Taylor, H. P., Jr., and Sheppard, S. M. F., 1986, Igneous rocks; I, Processes of isotopic fractionation and isotope systematics, *in* Valley, J. W., Taylor, H. P., Jr, and O'Neil, J. R., eds., *Stable Isotopes in high temperature processes: Reviews in Mineralogy* volume 16, Mineralogical Society of America, p. 227-271.
- Tulloch, A. J., 1979, Plutonic and metamorphic rocks in the Victoria Range segment of the Karamea Batholith [Ph.D. thesis]: University of Otago, Dunedin, New Zealand, 301 p.
- , 1986, Hydrothermal alteration and scheelite mineralization associated with the Barrytown Pluton, North Westland, New Zealand: *Mineral Deposits (Kuangchuan Dizhi)*, v. 5, no. 3, p. 27-36.
- , 1988, Batholiths, plutons, and suites; nomenclature for granitoid rocks of Westland-Nelson, New Zealand: *New Zealand Journal of Geology and Geophysics*, v. 31, no. 4, p. 505-509.
- , 1989, Magnetic susceptibilities of Westland-Nelson plutonic rocks; discrimination of Paleozoic and Mesozoic granitoid suites: *New Zealand Journal of Geology and Geophysics*, v. 32, no. 2, p. 197-203.
- Tulloch, A. J., and Brathwaite, R. L., 1986, C7; Granitoid rocks and associated mineralisation of Westland - West Nelson: *Record - New Zealand Geological Survey*, v. 13, p. 65-92.
- Tulloch, A. J., and Challis, G. A., 2000, Emplacement depths of Paleozoic-Mesozoic plutons from western New Zealand estimated by hornblende-Al geobarometry: *New Zealand Journal of Geology and Geophysics*, v. 43, no. 4, p. 555-567.
- Ward, C. M., 1984, Geology of the Dusky Sound area, Fiordland, with emphasis on the structural-metamorphic development of some pyroblastic staurolite pelites [Ph.D. thesis]: University of Otago, Dunedin, New Zealand, 353 p.
- Wilson, E., 1999, Geology of the lower Parapara River [MSc thesis]: Victoria University of Wellington, Wellington, New Zealand.
- York, D., 1967, The best isochron: *Earth and Planetary Science Letters*, v. 2, no. 5, p. 479-482.
- , 1969, Least squares fitting of a straight line with correlated errors: *Earth and Planetary Science Letters*, v. 5, no. 5, p. 320-324.

Table DR1. U-Pb data for Paleozoic plutons of western New Zealand and West Antarctica

| Sample No.   | Fraction, mineral, pretreatment | Weight (mg) | Concentrations |          |            |                |       | Radiogenic ratios                   |                                     |                                    |           |                                    |           |             |                                     | Age (Ma)  |                                    |                                    |                                     |
|--------------|---------------------------------|-------------|----------------|----------|------------|----------------|-------|-------------------------------------|-------------------------------------|------------------------------------|-----------|------------------------------------|-----------|-------------|-------------------------------------|-----------|------------------------------------|------------------------------------|-------------------------------------|
|              |                                 |             | U (ppm)        | Pb (ppm) | Pb(c) (pg) | Pb (rad) Pb(c) | Th U  | <sup>208</sup> Pb <sup>206</sup> Pb | <sup>206</sup> Pb <sup>204</sup> Pb | <sup>207</sup> Pb <sup>235</sup> U | err (2s%) | <sup>206</sup> Pb <sup>238</sup> U | err (2s%) | corr. coef. | <sup>207</sup> Pb <sup>206</sup> Pb | err (2s%) | <sup>206</sup> Pb <sup>238</sup> U | <sup>207</sup> Pb <sup>235</sup> U | <sup>207</sup> Pb <sup>206</sup> Pb |
| Nelson block |                                 |             |                |          |            |                |       |                                     |                                     |                                    |           |                                    |           |             |                                     |           |                                    |                                    |                                     |
| Oparara      | z1 AnLh**                       |             |                |          | 1.0        | 83.5           | 0.36  | 0.113                               | 5266                                | 0.4391                             | 0.09      | 0.05897                            | 0.06      | 0.647       | 0.054011                            | 0.07      | 369.33                             | 369.63                             | 371.5                               |
| OU50090      | z2 AnLh**                       |             |                |          | 1.04       | 54.21          | 0.28  | 0.088                               | 3499                                | 0.4403                             | 0.18      | 0.05911                            | 0.14      | 0.769       | 0.054015                            | 0.12      | 370.23                             | 370.43                             | 371.7                               |
|              | z3 AnLh**                       |             |                |          | 1.1        | 84.5           | 0.22  | 0.068                               | 5541                                | 0.4391                             | 0.13      | 0.05896                            | 0.08      | 0.637       | 0.054010                            | 0.10      | 369.29                             | 369.59                             | 371.5                               |
|              | z4 AnLh**                       |             |                |          | 0.5        | 292.2          | 0.16  | 0.050                               | 19429                               | 0.4405                             | 0.16      | 0.05911                            | 0.09      | 0.583       | 0.054041                            | 0.13      | 370.22                             | 370.57                             | 372.8                               |
|              | z5 AnLh**                       |             |                |          | 0.6        | 164.4          | 0.18  | 0.058                               | 10865                               | 0.4398                             | 0.11      | 0.05908                            | 0.06      | 0.553       | 0.053992                            | 0.09      | 370.02                             | 370.12                             | 370.7                               |
|              | >150um sp Lh                    | 2.400       | 165            | 11       |            |                |       |                                     |                                     | 20150                              | 0.6183    | 0.28                               | 0.06985   | 0.27        | 0.96                                | 0.064202  | 0.08                               | 435.2                              | 488.8                               |
| Flanagan     | 200um, 2:1, Ab, 22gr*           | 0.08        | 280            | 18       |            |                |       |                                     | 11023                               | 0.5491                             | 0.22      | 0.06470                            | 0.21      | 0.95        | 0.615580                            | 0.00      | 404.2                              | 444.5                              | 658.8                               |
| P45423       | 175um, 5:1, Lh, 21gr*           | 0.090       | 247            | 15       |            |                |       |                                     | 4687                                | 0.4174                             | 0.26      | 0.05597                            | 0.21      | 0.84        | 0.054085                            | 0.00      | 351.1                              | 354.2                              | 374.6                               |
|              | 125um, 5:1, 20gr*               | 0.120       | 144            | 14       |            |                |       |                                     | 108                                 | 0.4202                             | 1.00      | 0.05627                            | 0.32      | 0.48        | 0.054158                            | 0.89      | 352.9                              | 356.2                              | 377.6                               |
|              | 140um, 3:1, 13gr**              | 0.008       | 269            | 20       |            |                |       |                                     | 200                                 | 0.4208                             | 0.67      | 0.05606                            | 0.26      | 0.49        | 0.054440                            | 0.59      | 351.6                              | 356.6                              | 389.2                               |
|              | <74um                           | 3.500       | 1348           | 78       |            |                |       |                                     | 5376                                | 0.4242                             | 0.28      | 0.05714                            | 0.27      | 0.97        | 0.053843                            | 0.06      | 358.2                              | 359.1                              | 364.5                               |
| OU50087      | >74um                           | 3.500       | 458            | 27       |            |                |       |                                     | 3307                                | 0.4272                             | 0.29      | 0.05764                            | 0.27      | 0.96        | 0.053752                            | 0.08      | 361.2                              | 361.2                              | 360.7                               |
|              | <74um Lh                        | 4.900       | 426            | 25       |            |                |       |                                     | 4296                                | 0.4263                             | 0.30      | 0.05746                            | 0.28      | 0.96        | 0.053810                            | 0.08      | 360.2                              | 360.6                              | 363.0                               |
|              | >74um Lh                        | 4.8         | 195            | 11       |            |                |       |                                     | 15175                               | 0.4291                             | 0.29      | 0.05745                            | 0.27      | 0.96        | 0.054170                            | 0.08      | 360.1                              | 362.5                              | 378.0                               |
| Richmond     | z2 AnLh**                       |             |                |          | 0.5        | 87.5           | 0.41  | 0.128                               | 5445                                | 0.4280                             | 0.09      | 0.05769                            | 0.06      | 0.60        | 0.053806                            | 0.08      | 361.59                             | 361.77                             | 362.9                               |
| P40375       | z3 AnLh**                       |             |                |          | 0.4        | 118.7          | 0.37  | 0.118                               | 7448                                | 0.4278                             | 0.10      | 0.05768                            | 0.06      | 0.54        | 0.053785                            | 0.09      | 361.51                             | 361.59                             | 362.1                               |
|              | z1 AnLh**                       |             |                |          | 0.4        | 148.6          | 0.34  | 0.106                               | 9413                                | 0.4276                             | 0.09      | 0.05766                            | 0.05      | 0.62        | 0.053789                            | 0.07      | 361.35                             | 361.47                             | 362.2                               |
|              | bulk Lh                         | 1.50        | 17             | 345      |            |                |       |                                     | 31323.7                             | 0.3742                             | 0.28      | 0.05049                            | 0.27      | 0.98        | 0.053755                            | 0.05      | 317.54                             | 322.79                             | 360.81                              |
| Riwaka       | cg                              | 22.100      | 173            | 11       |            |                |       |                                     | 2151                                | 0.4311                             | 0.40      | 0.05808                            | 0.34      | 0.86        | 0.053830                            | 0.21      | 364.0                              | 364.0                              | 364.0                               |
| OU49215      | >250um Lh                       | 3.600       | 156            | 10       |            |                |       |                                     | 2496                                | 0.4283                             | 0.32      | 0.05785                            | 0.28      | 0.94        | 0.053670                            | 0.11      | 362.5                              | 361.8                              | 357.0                               |
|              | 250-150Lh                       | 5.400       | 139            | 9        |            |                |       |                                     | 3710                                | 0.4301                             | 0.29      | 0.05799                            | 0.28      | 0.95        | 0.053790                            | 0.09      | 363.4                              | 363.3                              | 362.0                               |
|              | <74um                           | 3.800       | 210            | 13       |            |                |       |                                     | 5551                                | 0.4329                             | 0.29      | 0.05830                            | 0.28      | 0.97        | 0.053860                            | 0.07      | 365.3                              | 365.3                              | 365.0                               |
|              | 200um, Ab48*                    | 1 grain     | 162            | 11       |            |                |       |                                     | 1757                                | 0.4275                             | 0.46      | 0.05764                            | 0.35      | 0.77        | 0.053781                            | 0.29      | 361.3                              | 361.4                              | 362.0                               |
|              | 200um, Ab6*                     | 1 grain     | 154            | 10       |            |                |       |                                     | 1917                                | 0.4275                             | 0.52      | 0.05763                            | 0.40      | 0.79        | 0.053805                            | 0.32      | 361.2                              | 361.4                              | 363.0                               |
|              | 200um, Lh28*                    | 1 grain     | 288            | 19       |            |                |       |                                     | 1064                                | 0.4261                             | 0.58      | 0.05741                            | 0.41      | 0.77        | 0.053825                            | 0.38      | 359.9                              | 360.4                              | 364.0                               |
|              | 200um*                          | 1 grain     | 140            | 9        |            |                |       |                                     | 1341                                | 0.4215                             | 0.27      | 0.05699                            | 0.24      | 0.89        | 0.053647                            | 0.11      | 357.3                              | 357.2                              | 356.0                               |
|              | z1a AnLh**                      | 0.009       | 60             | 4        | 0.4        | 83.7           | 0.92  | 0.294                               | 4565                                | 0.4287                             | 0.17      | 0.05774                            | 0.15      | 0.86        | 0.053853                            | 0.09      | 361.8                              | 362.3                              | 365.0                               |
|              | z2a AnLh**                      | 0.011       | 35             | 2        | 0.4        | 73.6           | 0.83  | 0.266                               | 4105                                | 0.4289                             | 0.38      | 0.05774                            | 0.25      | 0.67        | 0.053879                            | 0.28      | 361.9                              | 362.4                              | 366.0                               |
|              | z3 AnLh**                       | 0.007       | 68             | 5        | 0.5        | 59.7           | 0.90  | 0.287                               | 3280                                | 0.4309                             | 0.13      | 0.05798                            | 0.08      | 0.63        | 0.053894                            | 0.11      | 363.3                              | 363.8                              | 366.7                               |
| P71392       | z4, AnLh**                      | 0.009       | 91             | 6        | 0.3        | 193.9          | 1.03  | 0.325                               | 10314                               | 0.4315                             | 0.08      | 0.05807                            | 0.05      | 0.64        | 0.053886                            | 0.06      | 363.9                              | 364.2                              | 366.3                               |
|              | z5 AnLh**                       | 0.014       | 62             | 4        | 0.4        | 152.9          | 0.93  | 0.295                               | 8322                                | 0.4322                             | 0.09      | 0.05817                            | 0.06      | 0.66        | 0.053883                            | 0.07      | 364.5                              | 364.7                              | 366.2                               |
|              | z6 Ab, AnLh**                   | 0.007       | 111            | 7        | 0.6        | 78.1           | 0.63  | 0.201                               | 4582                                | 0.4312                             | 0.10      | 0.05803                            | 0.06      | 0.65        | 0.053885                            | 0.08      | 363.7                              | 364.0                              | 366.2                               |
|              | z7 Ab, AnLh**                   | 0.008       | 88             | 6        | 0.7        | 68.8           | 0.93  | 0.295                               | 3753                                | 0.4312                             | 0.10      | 0.05804                            | 0.07      | 0.68        | 0.053885                            | 0.08      | 363.7                              | 364.1                              | 366.2                               |
|              | z8 Ab, AnLh**                   | 0.012       | 65             | 4        | 0.6        | 89.2           | 0.76  | 0.240                               | 5068                                | 0.4315                             | 0.10      | 0.05808                            | 0.06      | 0.62        | 0.053890                            | 0.08      | 363.9                              | 364.3                              | 366.4                               |
|              | z9**                            | 0.005       | 85             | 6        | 1.9        | 14.8           | 1.01  | 0.323                               | 824                                 | 0.4259                             | 0.35      | 0.05735                            | 0.25      | 0.75        | 0.053864                            | 0.23      | 359.5                              | 360.3                              | 365.4                               |
|              | mz1,360x240x180um**             | 0.033       | 2241           | 440      | 36.1       | 405.4          | 10.72 | 3.402                               | 6657                                | 0.3697                             | 0.08      | 0.05077                            | 0.07      | 0.83        | 0.052811                            | 0.05      | 319.2                              | 319.4                              | 320.7                               |
|              | mz2, 180x130x65um**             | 0.004       | 837            | 342      | 4.5        | 289.5          | 26.75 | 8.490                               | 2262                                | 0.3586                             | 0.28      | 0.04943                            | 0.18      | 0.65        | 0.052618                            | 0.21      | 311.0                              | 311.2                              | 312.3                               |
|              | z2(3) Ab**                      | 0.002       | 490            | 24       | 2.9        | 13.3           | 0.24  | 0.076                               | 900                                 | 0.3671                             | 0.29      | 0.05049                            | 0.23      | 0.84        | 0.052732                            | 0.16      | 317.5                              | 317.5                              | 317.3                               |
|              | z3 Ab**                         | 0.001       | 664            | 32       | 0.7        | 23.4           | 0.13  | 0.043                               | 1620                                | 0.3699                             | 0.25      | 0.05080                            | 0.14      | 0.61        | 0.052806                            | 0.20      | 319.5                              | 319.6                              | 320.5                               |
| OU49201      | z4 Ab**                         | 0.001       | 236            | 12       | 0.6        | 13.2           | 0.25  | 0.081                               | 889                                 | 0.3648                             | 0.38      | 0.05007                            | 0.23      | 0.65        | 0.052841                            | 0.29      | 315.0                              | 315.8                              | 321.9                               |
|              | cg                              | 8.200       | 570            | 36       |            |                |       |                                     | 3640                                | 0.5675                             | 0.37      | 0.06453                            | 0.30      | 0.85        | 0.063780                            | 0.19      | 403.1                              | 456.4                              | 734.5                               |

Table DR1. U-Pb data for Paleozoic plutons of western New Zealand and West Antarctica

|                        |                        |        |        |       |      |        |      |       |       |        |      |         |       |       |          |      |        |        |        |
|------------------------|------------------------|--------|--------|-------|------|--------|------|-------|-------|--------|------|---------|-------|-------|----------|------|--------|--------|--------|
| <b>Crosscut</b>        | z1 Ab**                | 0.0063 | 241.71 | 14    | 1.0  | 86.8   | 0.19 | 0.082 | 5719  | 0.4826 | 0.14 | 0.06065 | 0.09  | 0.68  | 0.057713 | 0.10 | 379.55 | 399.84 | 518.91 |
| P52241                 | z2 Ab**                | 0.0051 | 331.92 | 19    | 2.7  | 35.1   | 0.18 | 0.058 | 2383  | 0.4381 | 0.19 | 0.05888 | 0.12  | 0.64  | 0.053971 | 0.15 | 368.78 | 368.93 | 369.82 |
|                        | z3 Ab**                | 0.009  | 393    | 22    | 1.2  | 157.0  | 0.16 | 0.051 | 10659 | 0.4374 | 0.08 | 0.05881 | 0.05  | 0.65  | 0.053939 | 0.06 | 368.4  | 368.4  | 368.5  |
|                        | mz                     | 0.100  | 2502   | 1987  |      |        |      |       | 750   | 0.4297 | 1.27 | 0.05817 | 1.24  | 0.98  | 0.053583 | 0.25 | 364.5  | 363.0  | 353.6  |
|                        | mz                     | 0.300  | 789    | 643   |      |        |      |       | 572   | 0.4109 | 0.98 | 0.05559 | 0.46  | 0.95  | 0.053616 | 0.86 | 348.7  | 349.6  | 354.9  |
| <b>Tarn Summit</b>     | z1 Ab**                | 0.008  | 473    | 26    | 1.0  | 217.8  | 0.12 | 0.039 | 14936 | 0.4459 | 0.08 | 0.05954 | 0.06  | 0.75  | 0.054315 | 0.05 | 372.8  | 374.4  | 384.1  |
| OU49209                | z2 Ab**                | 0.009  | 490.69 | 27    | 0.8  | 320.3  | 0.14 | 0.044 | 21860 | 0.4398 | 0.08 | 0.05906 | 0.05  | 0.65  | 0.054013 | 0.06 | 369.91 | 370.14 | 371.57 |
|                        | z3 Ab**                | 0.0017 | 405.49 | 23    | 0.8  | 464.6  | 0.14 | 0.045 | 31675 | 0.4393 | 0.07 | 0.05901 | 0.04  | 0.67  | 0.053997 | 0.05 | 369.58 | 369.77 | 370.91 |
|                        | >74um Lh               | 0.900  | 777    | 45    |      |        |      |       | 13794 | 0.4406 | 0.28 | 0.05913 | 0.27  | 0.98  | 0.054048 | 0.05 | 370.3  | 370.7  | 373.0  |
|                        | mz fg                  | 1.200  | 2740   | 959   |      |        |      |       | 6143  | 0.4063 | 1.29 | 0.05540 | 1.28  | 0.99  | 0.053188 | 0.13 | 347.6  | 346.2  | 336.8  |
| <b>Maruia</b>          | 180um, ar 5:1**Ab      | 0.006  | 661    | 36    | 1.80 |        |      | 0.05  | 7596  | 0.4056 | 0.11 | 0.05502 | 0.08  | 0.71  | 0.053470 | 0.08 | 345.3  | 345.7  | 348.8  |
| P52247                 |                        |        |        |       |      |        |      |       |       |        |      |         |       |       |          |      |        |        |        |
| <b>Tobin</b>           | ~300um Ab24*           | 0.100  | 443    | 30    |      |        |      |       | 378   | 0.4067 | 0.39 | 0.05512 | 0.33  | 0.87  | 0.053510 | 0.20 | 345.9  | 346.5  | 350.5  |
| P61003                 | 175-150, 5:1, Lh 8 gr* | 0.200  | 342    | 20    |      |        |      |       | 10230 | 0.4040 | 0.18 | 0.05478 | 0.16  | 0.92  | 0.053504 | 0.07 | 343.7  | 344.5  | 350.2  |
|                        | 250, 5:1, Lh 5 gr*     | 0.110  | 541    | 32    |      |        |      |       | 8982  | 0.4039 | 0.20 | 0.05479 | 0.18  | 0.92  | 0.053476 | 0.08 | 343.8  | 344.5  | 349.1  |
|                        | 600um prism, Ab6*      | 0.080  | 513    | 30    |      |        |      |       | 5231  | 0.4043 | 0.83 | 0.05493 | 0.82  | 0.99  | 0.053387 | 0.11 | 344.7  | 344.8  | 345.3  |
| <b>Barrytown</b>       | z1 Ab**                | 0.005  | 384    | 21.8  | 1.2  | 97.1   | 0.27 | 0.088 | 6380  | 0.4315 | 0.08 | 0.05793 | 0.06  | 0.68  | 0.054028 | 0.06 | 363.01 | 364.26 | 372.2  |
| P45412                 | z2 AnLh**              |        |        |       | 0.3  | 74.39  | 0.32 | 0.102 | 4737  | 0.4407 | 0.17 | 0.05907 | 0.08  | 0.49  | 0.054114 | 0.15 | 369.95 | 370.76 | 375.8  |
|                        | z3 AnLh**              |        |        |       | 0.3  | 170.6  | 0.30 | 0.096 | 10896 | 0.4380 | 0.11 | 0.05880 | 0.06  | 0.56  | 0.054018 | 0.10 | 368.35 | 368.82 | 371.8  |
|                        | z4 AnLh**              |        |        |       | 0.3  | 269.0  | 0.62 | 0.196 | 15785 | 0.4373 | 0.07 | 0.05879 | 0.05  | 0.65  | 0.053944 | 0.06 | 368.28 | 368.34 | 368.7  |
|                        | z5 AnLh**              |        |        |       | 0.8  | 95.3   | 0.19 | 0.059 | 6303  | 0.4370 | 0.11 | 0.05878 | (.06) | 0.55  | 0.053920 | 0.09 | 368.21 | 368.14 | 367.7  |
|                        | mz cg                  | 0.015  | 3952   | 1600  |      |        |      |       | 3112  | 0.4354 | 0.99 | 0.05882 | 0.98  | 0.99  | 0.053687 | 0.12 | 368.5  | 367.0  | 357.9  |
|                        | 74-105                 | 1.000  | 469    | 39    |      |        |      |       | 1811  | 0.7988 | 0.29 | 0.08060 | 0.27  | 0.95  | 0.071874 | 0.09 | 499.7  | 596.1  | 982.4  |
| <b>Falls Ck</b>        | mz1                    | 0.600  | 1956   | 640   |      |        |      |       | 2211  | 0.4507 | 0.22 | 0.06054 | 0.20  | 0.95  | 0.053996 | 0.09 | 378.9  | 377.5  | 370.9  |
| P45587                 | mz2                    | 0.220  | 2632   | 866   |      |        |      |       | 3386  | 0.4470 | 0.76 | 0.06030 | 0.75  | 0.99  | 0.053762 | 0.11 | 377.5  | 375.2  | 361.1  |
|                        | <44um Lh               | 1.600  | 397    | 25    |      |        |      |       | 6161  | 0.4531 | 0.28 | 0.06012 | 0.27  | 0.98  | 0.054663 | 0.06 | 376.3  | 379.5  | 398.5  |
|                        | >74um Lh               | 3.500  | 277    | 19    |      |        |      |       | 18551 | 0.5600 | 0.28 | 0.06650 | 0.27  | 0.98  | 0.061069 | 0.05 | 415.0  | 451.5  | 641.7  |
| <b>Rangitoto*</b>      | z1 Ab**                | 0.0015 | 627    | 37    | 0.6  | 103.44 | 0.31 | 0.098 | 6601  | 0.4380 | 0.11 | 0.05883 | 0.07  | 0.623 | 0.053995 | 0.09 | 368.50 | 368.82 | 370.8  |
| P52355                 | z2 Ab**                | 0.0019 | 331    | 20    | 0.5  | 77.3   | 0.42 | 0.132 | 4800  | 0.4385 | 0.14 | 0.05894 | 0.09  | 0.683 | 0.053961 | 0.10 | 369.18 | 369.21 | 369.4  |
|                        | z3 Ab**                | 0.0021 | 539    | 32    | 0.7  | 92.7   | 0.31 | 0.097 | 5922  | 0.4378 | 0.12 | 0.05883 | 0.08  | 0.662 | 0.053972 | 0.09 | 368.50 | 368.69 | 369.9  |
|                        | z4 AnLh**              |        |        |       | 0.4  | 66.8   | 0.56 | 0.176 | 4000  | 0.4400 | 0.18 | 0.05907 | 0.08  | 0.467 | 0.054023 | 0.16 | 369.98 | 370.26 | 372.0  |
|                        | z5 AnLh**              |        |        |       | 0.4  | 182.1  | 0.44 | 0.138 | 11215 | 0.4392 | 0.10 | 0.05901 | 0.06  | 0.564 | 0.053984 | 0.09 | 369.58 | 369.69 | 370.4  |
|                        | z6 AnLh**              |        |        |       | 0.4  | 137.5  | 0.42 | 0.132 | 8519  | 0.4397 | 0.11 | 0.05908 | 0.05  | 0.513 | 0.053976 | 0.09 | 370.02 | 370.02 | 370.1  |
|                        | z7 AnLh**              |        |        |       | 1.0  | 22.4   | 0.40 | 0.129 | 1408  | 0.4413 | 0.26 | 0.05914 | 0.15  | 0.601 | 0.054118 | 0.21 | 370.38 | 371.15 | 375.9  |
| <b>Kakapotahi*</b>     | mz                     | 1.800  | 3666   | 1143  |      |        |      |       | 25777 | 0.4507 | 1.12 | 0.06068 | 1.12  | 0.99  | 0.053867 | 0.08 | 379.8  | 377.8  | 365.5  |
| P52283                 | mz                     | 0.300  | 3422   | 1173  |      |        |      |       | 493   | 0.4462 | 0.91 | 0.06014 | 0.82  | 0.91  | 0.053808 | 0.39 | 376.5  | 374.6  | 363.0  |
| <b>Paringa</b>         | z1 Ab**                | 0.002  | 449    | 28    | 1.0  | 60.9   | 0.54 | 0.170 | 3662  | 0.4382 | 0.12 | 0.05890 | 0.07  | 0.603 | 0.053958 | 0.10 | 368.91 | 368.96 | 369.3  |
| P45595                 | z2 AnLh**              |        |        |       | 0.5  | 63.6   | 0.41 | 0.130 | 3957  | 0.4389 | 0.15 | 0.05894 | 0.07  | 0.514 | 0.054010 | 0.13 | 369.16 | 369.48 | 371.5  |
|                        | z3 AnLh**              |        |        |       | 0.4  | 68.2   | 0.35 | 0.111 | 4311  | 0.4399 | 0.13 | 0.05901 | 0.07  | 0.569 | 0.054064 | 0.11 | 369.61 | 370.17 | 373.7  |
|                        | z4 AnLh**              |        |        |       | 0.5  | 98.4   | 0.78 | 0.248 | 5555  | 0.4394 | 0.22 | 0.05897 | 0.14  | 0.656 | 0.054045 | 0.17 | 369.37 | 369.86 | 373.0  |
|                        | z5 AnLh**              |        |        |       | 0.6  | 80.1   | 0.42 | 0.134 | 4960  | 0.4400 | 0.17 | 0.05897 | 0.08  | 0.467 | 0.054113 | 0.15 | 369.35 | 370.23 | 375.7  |
|                        | z6 AnLh**              |        |        |       | 0.5  | 63.43  | 0.43 | 0.137 | 3924  | 0.4399 | 0.14 | 0.05900 | 0.08  | 0.556 | 0.054078 | 0.12 | 369.51 | 370.17 | 374.3  |
|                        | Titanite*              | 8.000  | 12.434 | 1.276 |      |        |      |       | 211   | 0.4329 | 0.90 | 0.05823 | 0.40  | 0.49  | 0.053924 | 0.79 | 364.8  | 365.3  | 367.9  |
| <b>Fiordland block</b> |                        |        |        |       |      |        |      |       |       |        |      |         |       |       |          |      |        |        |        |

Table DR1. U-Pb data for Paleozoic plutons of western New Zealand and West Antarctica

|                       |                      |        |        |      |     |       |      |        |         |        |       |          |       |       |          |      |        |        |       |
|-----------------------|----------------------|--------|--------|------|-----|-------|------|--------|---------|--------|-------|----------|-------|-------|----------|------|--------|--------|-------|
| <b>Horatio</b>        | 350x75um, 1gr, Ab**  | 0.006  | 358    | 20   | 2.3 | 51.5  | 0.41 | 0.130  | 3207.6  | 0.4126 | 0.13  | 0.05587  | 0.09  | 0.68  | 0.053560 | 0.10 | 350.48 | 350.75 | 352.6 |
| OU49111               | 300x60um, 3gr, Ab**  | 0.010  | 415    | 24   | 1.1 | 223.5 | 0.43 | 0.138  | 13777   | 0.4094 | 0.13  | 0.05543  | 0.06  | 0.46  | 0.053574 | 0.12 | 347.75 | 348.46 | 353.2 |
| <b>Dolphin</b>        | cg Lh                | 5.700  | 180    | 10   |     |       |      |        | 39631   | 0.4290 | 0.28  | 0.05779  | 0.28  | 0.98  | 0.053839 | 0.05 | 362.2  | 362.5  | 364.3 |
| OU49115               | Kfg                  | 21.200 | 299    | 17   |     |       |      |        | 5476    | 0.4290 | 0.33  | 0.05773  | 0.33  | 0.98  | 0.053902 | 0.07 | 361.8  | 362.5  | 367.0 |
|                       | Kcg                  | 20.020 | 171    | 11   |     |       |      |        | 484     | 0.4261 | 0.56  | 0.05750  | 0.32  | 0.96  | 0.053740 | 0.44 | 360.4  | 360.4  | 360.0 |
| <b>Mt Evans</b>       | z1 Ab**              | 0.006  | 198    | 11   | 0.6 | 110.6 | 0.23 | 0.072  | 7368    | 0.4115 | 0.08  | 0.05575  | 0.05  | 0.66  | 0.053539 | 0.06 | 349.7  | 350.0  | 351.7 |
| P78948                | z2 Ab**              | 0.005  | 229    | 13   | 0.4 | 132.1 | 0.34 | 0.106  | 8537    | 0.4109 | 0.10  | 0.05572  | 0.06  | 0.60  | 0.053485 | 0.08 | 349.5  | 349.5  | 349.4 |
|                       | <105um Ab            | 3.60   | 513    | 36   |     |       |      |        | 27241   | 0.6206 | 0.28  | 0.07156  | 0.28  | 0.98  | 0.062895 | 0.06 | 445.6  | 490.2  | 704.7 |
| <b>Newton</b>         | z2 Ab**              | 3.7    | 362    | 19   | 0.5 | 153.2 | 0.13 | 0.043  | 10479   | 0.4078 | 0.08  | 0.05529  | 0.05  | 0.64  | 0.053500 | 0.06 | 346.9  | 347.3  | 350.1 |
| P64999                | z1 Ab**              | 2.9    | 903    | 47   | 1.0 | 135.9 | 0.15 | 0.048  | 9252    | 0.4038 | 0.08  | 0.05479  | 0.05  | 0.64  | 0.053461 | 0.06 | 343.8  | 344.4  | 348.4 |
| <b>Houeroof</b>       | mz 1                 | 2.00   | 613.67 | 338  |     |       |      | 0.0986 | 1646    | 0.4106 | 0.54  | 0.05606  | 0.52  | 0.96  | 0.053129 | 0.16 | 351.6  | 349.33 | 334.3 |
| OU58013               | mz 3                 | 0.50   | 2011.6 | 1105 |     |       |      | 0.0971 | 2118    | 0.404  | 1.33  | 0.05531  | 1.32  | 0.99  | 0.052982 | 0.17 | 347.0  | 344.6  | 328.0 |
| <b>Tower</b>          | z1 AnLh**            |        |        |      | 0.6 | 63.5  | 0.49 | 0.154  | 3874    | 0.4126 | 0.14  | 0.05592  | 0.07  | 0.53  | 0.053517 | 0.12 | 350.8  | 350.8  | 350.8 |
| P73425                |                      |        |        |      |     |       |      |        |         |        |       |          |       |       |          |      |        |        |       |
| <b>Poteriteri</b>     | z1 AnLh**            |        |        |      | 0.4 | 112   | 0.60 | 0.190  | 6600.7  | 0.3843 | 0.13  | 0.052480 | 0.07  | 0.567 | 0.053107 | 0.11 | 329.73 | 330.18 | 333.3 |
| P74751                | z2 AnLh**            |        |        |      | 0.4 | 127   | 0.46 | 0.146  | 7811.9  | 0.3835 | 0.10  | 0.052412 | 0.06  | 0.588 | 0.053072 | 0.08 | 329.31 | 329.63 | 331.8 |
|                       | z3 AnLh**            |        |        |      | 0.4 | 237   | 0.43 | 0.138  | 14578.2 | 0.3832 | 0.08  | 0.052387 | 0.05  | 0.633 | 0.053047 | 0.06 | 329.16 | 329.36 | 330.8 |
| <b>Alice</b>          | z2 AnLh**            |        |        |      | 0.5 | 21.2  | 0.77 | 0.244  | 1216.8  | 0.3996 | 0.35  | 0.054325 | 0.17  | 0.555 | 0.053350 | 0.29 | 341.02 | 341.37 | 343.7 |
| P74756                | z1 AnLh**            |        |        |      | 0.4 | 30.3  | 0.82 | 0.258  | 1710.0  | 0.3986 | 0.29  | 0.054314 | 0.13  | 0.530 | 0.053224 | 0.24 | 340.95 | 340.62 | 338.4 |
|                       | z3 AnLh**            |        |        |      | 0.5 | 51.3  | 0.77 | 0.245  | 2915.5  | 0.3991 | 0.18  | 0.054292 | 0.09  | 0.538 | 0.053309 | 0.15 | 340.82 | 340.97 | 342.0 |
| <b>Big</b>            | z1 AnLh**            |        |        |      | 0.3 | 199.3 | 0.49 | 0.156  | 12093   | 0.4181 | 0.09  | 0.05649  | 0.05  | 0.64  | 0.053679 | 0.07 | 354.21 | 354.66 | 357.6 |
| P70787                | z2 AnLh**            |        |        |      | 1.4 | 72.7  | 0.23 | 0.072  | 4752    | 0.4179 | 0.09  | 0.05650  | 0.06  | 0.69  | 0.053643 | 0.06 | 354.28 | 354.52 | 356.1 |
|                       | z3 AnLh**            |        |        |      | 0.3 | 225.0 | 0.47 | 0.149  | 13735   | 0.4182 | 0.08  | 0.05651  | 0.05  | 0.58  | 0.053667 | 0.07 | 354.39 | 354.75 | 357.1 |
|                       | z4 AnLh**            |        |        |      | 0.3 | 322.7 | 0.30 | 0.094  | 20638   | 0.4182 | 0.09  | 0.05657  | 0.05  | 0.58  | 0.053618 | 0.07 | 354.75 | 354.79 | 355.0 |
|                       | z5 AnLh**            |        |        |      | 0.7 | 49.3  | 0.34 | 0.108  | 3131    | 0.4181 | 0.12  | 0.05654  | 0.07  | 0.61  | 0.053627 | 0.10 | 354.57 | 354.68 | 355.4 |
|                       | z6 AnLh**            |        |        |      | 0.4 | 123.1 | 0.22 | 0.071  | 8053    | 0.4177 | 0.10  | 0.05651  | 0.05  | 0.53  | 0.053607 | 0.08 | 354.35 | 354.38 | 354.6 |
| <b>Ridge dike</b>     | z1 AnLh**            |        |        |      | 0.4 | 330.1 | 1.23 | 0.391  | 16745   | 0.4121 | (.08) | 0.05582  | (.05) | 0.593 | 0.053544 | 0.07 | 350.1  | 350.4  | 352.0 |
| P71266                | z2 AnLh**            |        |        |      | 0.5 | 221.7 | 0.36 | 0.113  | 13960   | 0.4130 | (.09) | 0.05600  | (.05) | 0.571 | 0.053488 | 0.07 | 351.2  | 351.0  | 349.6 |
| <b>Stewart Island</b> |                      |        |        |      |     |       |      |        |         |        |       |          |       |       |          |      |        |        |       |
| <b>Ruggedy</b>        | 220x90, Ab**         | 0.003  | 255    | 15   | 4.0 | 12.1  | 0.52 | 0.164  | 763     | 0.3996 | 0.63  | 0.05441  | 0.57  | 0.92  | 0.053260 | 0.25 | 341.6  | 341.4  | 340.1 |
| P 62175               | 200x80, Ab**         | 0.003  | 279    | 17   | 5.7 | 8.9   | 0.50 | 0.158  | 566     | 0.4016 | 0.61  | 0.05461  | 0.53  | 0.89  | 0.053340 | 0.27 | 342.8  | 342.8  | 343.4 |
| <b>Freds Camp</b>     | z1 AnLh**            |        |        |      | 0.4 | 60.3  | 0.57 | 0.181  | 3598    | 0.3515 | (.16) | 0.04858  | (.08) | 0.543 | 0.052472 | 0.14 | 305.83 | 305.85 | 306.0 |
| P 57426               | z2 AnLh**            |        |        |      | 0.6 | 66.2  | 0.57 | 0.182  | 3949    | 0.3513 | (.15) | 0.04854  | (.07) | 0.495 | 0.052490 | 0.13 | 305.55 | 305.70 | 306.8 |
|                       | z3 AnLh**            |        |        |      | 0.4 | 80.7  | 0.55 | 0.176  | 4835    | 0.3515 | (.14) | 0.04857  | (.07) | 0.517 | 0.052491 | 0.12 | 305.76 | 305.88 | 306.9 |
|                       | z4 AnLh**            |        |        |      | 1.1 | 33.8  | 0.62 | 0.196  | 2000    | 0.3516 | (.17) | 0.04855  | (.10) | 0.654 | 0.052525 | 0.13 | 305.61 | 305.93 | 308.3 |
| P 58515               | 150-125, 3 gr*       | 0.02   | 663    | 27   |     |       |      |        | 895     | 0.2428 | 0.48  | 0.03354  | 0.39  | 0.82  | 0.052508 | 0.30 | 212.7  | 220.7  | 307.6 |
| <b>Ridge</b>          | z1 Ab**              | 0.002  | 155.3  | 10.6 | 0.5 | 31.3  | 0.28 | 0.114  | 1976    | 0.5418 | 0.21  | 0.06746  | 0.15  | 0.74  | 0.058249 | 0.15 | 420.8  | 439.6  | 539.2 |
| P 57323               | z2 Ab**              | 0.001  | 152.2  | 9.7  | 6.0 | 27.6  | 0.63 | 0.158  | 1617    | 0.4403 | 0.46  | 0.05866  | 0.25  | 0.58  | 0.054441 | 0.38 | 367.5  | 370.5  | 389.3 |
|                       | z3 Ab**              | 0.001  | 241.5  | 14.7 | 0.5 |       |      | 0.211  | 210     | 0.4679 | 2.45  | 0.05684  | 2.33  | 0.96  | 0.059701 | 0.65 | 356.4  | 389.7  | 592.7 |
|                       | z4 AnLh**            |        |        |      | 0.3 | 208.1 | 0.11 | 0.049  | 13627   | 1.1158 | 0.08  | 0.11178  | 0.05  | 0.59  | 0.072393 | 0.07 | 683.1  | 761.0  | 997.0 |
|                       | z5 AnLh**            |        |        |      | 0.2 | 48.9  | 0.40 | 0.129  | 3049    | 0.4128 | 0.15  | 0.05584  | 0.08  | 0.54  | 0.053621 | 0.13 | 350.3  | 350.9  | 355.2 |
|                       | 100-75 lh*           | 0.10   | 152    | 9    |     |       |      |        | 760     | 0.4030 | 0.36  | 0.05477  | 0.27  | 0.76  | 0.053361 | 0.24 | 343.7  | 343.8  | 344.1 |
| <b>Table</b>          | z2 Ab**              | 0.002  | 654.4  | 39.5 | 0.4 | 92.7  | 0.32 | 0.290  | 9396    | 0.3829 | 0.09  | 0.05224  | 0.05  | 0.62  | 0.053161 | 0.07 | 328.2  | 329.2  | 335.7 |
| P60678                | z1 Ab**              | 0.001  | 998.8  | 45.3 | 0.7 | 172.2 | 0.89 | 0.113  | 5788    | 0.3290 | 0.10  | 0.04525  | 0.06  | 0.62  | 0.052728 | 0.08 | 285.3  | 288.8  | 317.1 |
| <b>Knob</b>           | mz 125x90x40, 15 gr* | 0.09   | 750    | 30   |     |       |      |        | 6245    | 0.3215 | 0.78  | 0.04444  | 0.77  | 0.99  | 0.052460 | 0.90 | 280.2  | 283.1  | 305.5 |

**Table DR1. U-Pb data for Paleozoic plutons of western New Zealand and West Antarctica**

|                        |                     |      |      |     |      |        |      |         |      |      |          |      |       |       |       |
|------------------------|---------------------|------|------|-----|------|--------|------|---------|------|------|----------|------|-------|-------|-------|
| P63648                 | mz 315x200x?, 1 gr* | 0.10 | 1695 | 622 | 3170 | 0.3092 | 0.44 | 0.04277 | 0.44 | 0.98 | 0.052443 | 0.62 | 269.9 | 273.6 | 304.8 |
| <b>Marie Byrd Land</b> |                     |      |      |     |      |        |      |         |      |      |          |      |       |       |       |
| Chester Mts            | mz fg               | 4.00 | 3049 | 712 | 2044 | 0.4114 | 0.34 | 0.05585 | 0.31 | 0.92 | 0.053431 | 0.13 | 350.3 | 349.9 | 347.2 |
| Chester2               | mz cg               | 4.00 | 2501 | 657 | 3332 | 0.4242 | 0.44 | 0.05746 | 0.43 | 0.98 | 0.053551 | 0.08 | 360.2 | 359.1 | 352.2 |
| Neptune                | mz fg               | 2.60 | 7498 | 911 | 7630 | 0.4026 | 0.22 | 0.05468 | 0.21 | 0.97 | 0.053400 | 0.05 | 343.2 | 343.6 | 345.8 |
| Neptune6               | mz cg               | 3.00 | 6354 | 856 | 5834 | 0.3961 | 0.27 | 0.05388 | 0.26 | 0.98 | 0.053321 | 0.05 | 338.3 | 338.8 | 342.5 |

Mineral analysed is zircon, unless noted: mz is monazite. Ab is air abrasion, Lh is leaching AnLh is Annealing and Leaching pretreatment (Mattinson 2003).

San Diego State University

Samples: prefix OU Geology Department at Otago University followed by NZMS grid reference.

Fractions analyzed; 60, 100, 200 = mesh sizes; cg = coarse grained, bulk. L indicates leaching of fraction with HF on hotplate at c.100°C for 2 days prior to dissolution following methods outlined in Kimbrough et al. (1992).

Separation of U and Pb was done using HCl column chemistry. Concentrations were determined using a mixed 208Pb/235U spike.

Lead isotopic compositions corrected for ~0.10% ±0.05% per mass unit mass fractionation, based on replicate analyses of NBS 981 & NBS 983. Errors for 206Pb/204Pb measurements were minimized by use of an ion counting Daly multiplier system for detection of the small 204Pb signal and are typically less than 1%.

Ages calculated with following decay constants: 1.55125E-10 = 238U and 9.8485E-10 = 235U. Present day 238U/235U = 137.88.

Corrections for common lead were made using Stacey and Kramers (1975) lead model isotopic compositions for the interpreted crystallization age. Total lead blanks averaged c. 25 picograms. Pb\* = radiogenic lead. The 2-sigma value for analytical errors are shown in parentheses behind lead isotopic compositions.

Accuracy of 206\*Pb/238U dates is better than ±0.5% (c. ±1Ma) based on long-term reproducibility of a "standard" zircon sample (OU49127). Uncertainties in the 207\*Pb/206\*Pb dates computed with PBDAT (Ludwig, 1989) and are stated at the two-sigma level assuming a ±0.1 uncertainty in the common 207Pb/204Pb.

\*GNS Science /Otago University/Brown University (NW Walker)

? Size of longest dimension in microns; ab = mechanically abraded for 6 hours; L = 24 hr leach in 48%HF on hotplate in sealed Teflon capsule prior to digestion.

+Total Pb concentration includes blank Pb, common Pb in zircon and radiogenic Pb. Total procedural blanks are ~2 picograms for U and ~8 picograms for Pb.

# Measured isotopic ratios corrected for mass fractionation of ~ 0.11% per atomic mass unit based on analyses of NIST SRM981 and 982 and adjusted for small amount of 206Pb in tracer.

Uncertainty in the calculated ages is stated at the two-sigma

level and estimated from combined uncertainties in calibrations of mixed 205Pb - 233U - 235U tracer, measurement of isotopic ratios

of Pb and U, common and laboratory blank Pb isotopic ratios, Pb and U mass fractionation corrections, and reproducibility in measurement of NIST Pb and U standards.

\*\*MIT

Sample weights are estimated by using a video monitor and are known to within 40%. Corr. coef. = correlation coefficient.

206Pb/204Pb -measured ratio corrected for spike and fractionation only. # Corrected for fractionation, spike, blank, and initial common Pb.

Mass fractionation correction of 0.25%/amu ± 0.04%/amu (atomic mass unit) was applied to single-collector Daly analyses and 0.07%/amu ± 0.04% for dynamic Faraday-Daly analyses. Total procedural blank less than 0.5 pg for Pb and less than 0.1 pg for U. c is common Pb, rad is radiogenic Pb

Blank isotopic composition: 206Pb/204Pb = 19.10 ± 0.1, 207Pb/204Pb = 15.71 ± 0.1, 208Pb/204Pb = 38.65 ± 0.1.

Age calculations are based on the decay constants of Steiger and Jäger (1977). Common-Pb corrections were calculated by using the model of Stacey and Kramers (1975) and the interpreted age of the sample.

Table S2. Sr, Nd isotopic data for Paleozoic plutons of western New Zealand

| Sample no.    | Pluton/unit    | Granite type | Age, Ma | Rb ppm | Sr ppm | <sup>87</sup> Rb/ <sup>86</sup> Sr | <sup>87</sup> Sr/ <sup>86</sup> Sr | err | Sr <sub>i</sub> | Sm ppm | Nd ppm | <sup>147</sup> Sm/ <sup>144</sup> Nd | <sup>143</sup> Nd/ <sup>144</sup> Nd | err | eNd (T)      | TDM |
|---------------|----------------|--------------|---------|--------|--------|------------------------------------|------------------------------------|-----|-----------------|--------|--------|--------------------------------------|--------------------------------------|-----|--------------|-----|
| <b>Buller</b> |                |              |         |        |        |                                    |                                    |     |                 |        |        |                                      |                                      |     |              |     |
| P45423*       | Flanagan       | I            | 350     | 43.9   | 332.7  | 0.38                               | 0.706531                           | 15  | <b>0.70464</b>  | 2.9    | 11.6   | 0.148                                | 0.512419                             | 10  | <b>-2.1</b>  | 1.7 |
| P50892        | Toropuhihi-1   | A            | 300     | 512.0  | 15.39  | 101                                | 1.1616                             | 1   | ?               | 9.6    | 29.2   | 0.2005                               | 0.512751                             | 4   | <b>2.1</b>   |     |
| OU49201       | Foulwind       | A            | 320     | 223.8  | 115    | 5.646                              | 0.737013                           | 13  | <b>0.71130</b>  | 13.1   | 66.2   | 0.1194                               | 0.512475                             | 4   | <b>0.1</b>   | 0.9 |
| P45613        | Barrytown rim  | S            | 368     | 239.8  | 108.1  | 6.516                              | 0.746507                           | 12  | <b>0.71237</b>  | 8.2    | 41.9   | 0.1185                               | 0.512185                             | 20  | <b>-5.0</b>  | 1.4 |
| UC6762        | Barrytown core | S            | 368     | 310.6  | 69.8   | 12.953                             | 0.776073                           | 9   | <b>0.70821</b>  | 10.4   | 50.4   | 0.1246                               | 0.512147                             | 5   | <b>-6.1</b>  | 1.5 |
| OU45278*      | Tobin          | I            | 350     | 51.6   | 336.8  | 0.44                               | 0.707115                           | 15  | <b>0.70492</b>  | 8.0    | 37.2   | 0.1300                               | 0.512483                             | 10  | <b>0.0</b>   | 1.2 |
| P45595        | Paringa        | I            | 368     | 50.5   | 485.6  | 0.301                              | 0.708362                           | 10  | <b>0.70678</b>  | 2.6    | 15.2   | 0.1069                               | 0.512307                             | 4   | <b>-2.1</b>  |     |
| P52247        | Maruia         | S            | 350     | 131.0  | 274    | 1.384                              | 0.71330                            | 14  | <b>0.70640</b>  | na     | na     | na                                   | na                                   | na  | <b>na</b>    |     |
| P78948**      | Mt Evans       | S            | 350     | 154.5  | 135.1  | 3.318                              | 0.72602                            | 4   | <b>0.70949</b>  | 5.4    | 26.3   | 0.1251                               | 0.512208                             | 20  | <b>-5.2</b>  | 1.6 |
| P40732**      | Greenland Gp   |              | 360     | 124.0  | 98.6   | 3.653                              | 0.738570                           | 40  | <b>0.71985</b>  | 6.2    | 32.1   | 0.1168                               | 0.511892                             | 20  | <b>-10.9</b> | 2.0 |
| P39122**      | Greenland Gp   |              | 360     | 111.5  | 159.3  | 2.031                              | 0.730010                           | 40  | <b>0.71960</b>  | 6.7    | 34.0   | 0.1185                               | 0.512027                             | 20  | <b>-8.3</b>  | 1.8 |
| <b>Takaka</b> |                |              |         |        |        |                                    |                                    |     |                 |        |        |                                      |                                      |     |              |     |
| P51535        | Motueka-1      | A            | 350     | 148.6  | 163.8  | 0.0725                             | 0.718847                           | 11  | <b>0.70575</b>  | 4.4    | 14.7   | 0.1334                               | 0.512752                             | 12  | <b>5.1</b>   |     |
| OU49115       | Dolphin        | I            | 360     | 2.9    | 781.6  | 0.1114                             | 0.704293                           | 12  | <b>0.70375</b>  | 3.1    | 15.1   | 0.1248                               | 0.512652                             | 8   | <b>3.6</b>   |     |
| P57098        | Milford        | I            | 360     | 42.2   | 591.9  | 0.2059                             | 0.704505                           | 9   | <b>0.70345</b>  | 3.9    | 18.7   | 0.1251                               | 0.512601                             | 4   | <b>2.6</b>   |     |
| OU51818***    | George Sound   | A            | 300     | 87.4   | 233.7  | 1.083                              | 0.71006                            | 30  | <b>0.70544</b>  | 5.1    | 34.1   | 0.0903                               | 0.512411                             | 9   | <b>0.3</b>   |     |
| OU51820***    | George Sound   | A            | 300     | 14.0   | 663.1  | 0.0612                             | 0.705411                           | 36  | <b>0.70515</b>  | 9.0    | 46.1   | 0.1185                               | 0.512610                             | 21  | <b>3.0</b>   |     |
| OU51828***    | George Sound   | A            | 300     | 129.5  | 120.3  | 3.118                              | 0.721921                           | 19  | <b>0.70861</b>  | 12.2   | 49.8   | 0.1481                               | 0.512663                             | 20  | <b>2.7</b>   |     |
| OU51833***    | George Sound   | A            | 300     | 81.6   | 454.7  | 0.5193                             | 0.707464                           | 38  | <b>0.70525</b>  | 14.7   | 89.3   | 0.0998                               | 0.512623                             | 16  | <b>4.0</b>   |     |
| OU51833***    | George Sound   | A            | 300     | 32.9   | 922.8  | 0.103                              | 0.704481                           | 19  | <b>0.70404</b>  | 8.3    | 36.8   | 0.1369                               | 0.512733                             | 15  | <b>4.5</b>   |     |
| OU51837***    | George Sound   | A            | 300     | 95.4   | 51.95  | 5.338                              | 0.750917                           | 21  | <b>0.72813</b>  | 20.6   | 77.3   | 0.1612                               | 0.512669                             | 12  | <b>2.2</b>   |     |
| P57323        | Ridge          | S            | 345     | 103.7  | 408.9  | 7.522                              | 0.71064                            | 12  | <b>0.70704</b>  | 4.8    | 25.3   | 0.1147                               | 0.512175                             | 5   | <b>-5.4</b>  | 1.3 |
| OU49111**     | Horatio        | S            | 350     | 41     | 339.2  | 0.3502                             | 0.70762                            | 4   | <b>0.70587</b>  | 4.1    | 22.6   | 0.1084                               | 0.512322                             | 20  | <b>-2.2</b>  | 1.2 |
| P57426        | Freds Camp     | Peralk       | 300     | 285.9  | 13.1   | 64.41                              | 0.859232                           | ?   | ?               | 5.9    | 30.0   | 0.1192                               | 0.512858                             | 5   | <b>1.9</b>   |     |
| P58515        | Freds Camp     | Peralk       | 300     | 64.0   | 79     | 2.430                              | 0.716355                           | 20  | <b>0.70598</b>  | 2.5    | 11.5   | 0.1335                               | 0.512538                             | 5   | <b>0.6</b>   |     |
| P63648**      | Knob           | A            | 310     | 182.6  | 129.8  | 4.083                              | 0.72639                            | 36  | <b>0.70838</b>  | 10.9   | 60.6   | 0.1086                               | 0.512305                             | 20  | <b>-3.0</b>  |     |
| P62175        | Ruggedy        | I            | 340     | 96.2   | 72.5   | 3.770                              | 0.720528                           | 11  | <b>0.70228</b>  | 5.3    | 24.6   | 0.1307                               | 0.512581                             | 6   | <b>1.9</b>   |     |
| OU49156       | Echinus        | I            | 310     | 55.1   | 205    | 0.763                              | 0.706475                           | 12  | <b>0.70311</b>  | 3.1    | 15.4   | 0.1223                               | 0.512600                             | 17  | <b>2.2</b>   |     |
| OU49141*      | Roxburgh       | I            | 340     | 10.1   | 169.4  | 0.17                               | 0.706158                           | 15  | <b>0.70533</b>  | 4.3    | 27.5   | 0.0950                               | 0.512447                             | 10  | <b>0.7</b>   | 0.9 |

Samples analysed by N. Walker, Brown University, except where otherwise indicated

\* Analysed by D.L. Parkinson at UCSB:

Sr normalized to <sup>86</sup>Sr/<sup>88</sup>Sr = 0.1194; NBS 987 = 0.710235, BCR-1 = 0.70500. T DM calculated using <sup>143</sup>Nd/<sup>144</sup>Nd(0)=0.51315; <sup>147</sup>Sm/<sup>144</sup>Nd=0.2137; present day CHUR=0.512638, with <sup>146</sup>Nd/<sup>144</sup>Nd=0.7219. Ames=0.511890 ± 10 (n=25); BCR-1=0.512630 ± 10 (n=10)

\*\* Analysed at La Trobe University (Roland Maas) May, June 2001

All Nd isotope ratios are relative to LaJolla=0.511860. CHUR is 0.512638. Depleted mantle model ages calculated for linear depleted mantle evolution (4.57 Ga to 0 Ga) with present-day parameters of 0.2136 and 0.513144

Errors (2 sigma pop) based on reproducibility of standard rocks: <sup>87</sup>Rb/<sup>86</sup>Sr ± 0.5%; <sup>87</sup>Sr/<sup>86</sup>Sr ± 0.00004 or about ± 0.006% <sup>147</sup>Sm/<sup>144</sup>Nd ± 0.2%; <sup>143</sup>Nd/<sup>144</sup>Nd ± 0.000020 or ± 0.004%. In-run errors are always less than quoted reproducibilities

\*\*\* Analysed by DLK, San Diego State University na not analysed

**Table DR3. Oxygen isotope data for quartz from Paleozoic plutons**

|                                                     | <b>Granite</b> |               | <b><math>\delta^{18}\text{O}</math></b> | <b><math>\delta^{18}\text{O}</math></b> |
|-----------------------------------------------------|----------------|---------------|-----------------------------------------|-----------------------------------------|
|                                                     | <b>type</b>    | <b>Sample</b> | <b>Qtz</b>                              | <b>magma</b>                            |
| <b>Karamea</b>                                      |                |               |                                         |                                         |
| Oparara                                             | S              | P45397        | 12.5                                    | 11.0                                    |
| Waterfall                                           | S              | OU50115       | 13.5                                    | 12.0                                    |
| Dunphy                                              | S              | P45395        | 12.9                                    | 11.4                                    |
| Dunphy                                              | S              | RNZ199        | 14.4                                    | 12.9                                    |
| Dunphy                                              | S              | RNZ212        | 14.4                                    | 12.9                                    |
| Whale Ck                                            | S              | P45394        | 12.8                                    | 11.3                                    |
| Whale Ck                                            | S              | RNZ169        | 12.6                                    | 11.1                                    |
| O'Sullivan's                                        | S              | RNZ120        | 13.4                                    | 11.9                                    |
| Barrytown                                           | S              | KF190201-10   | 12.9                                    | 11.4                                    |
| Barrytown                                           | S              | P45613        | 13.5                                    | 12.0                                    |
| Tarn Summ                                           | S              | OU49209       | 12.5                                    | 11.0                                    |
| Tarn Summ                                           | S              | R6156         | 12.6, 12.7                              | 11.2                                    |
| Crosscut                                            | S              | P52241        | 12.2, 12.3                              | 10.8                                    |
| Falls Creek                                         | S              | P45587        | 14.0                                    | 12.5                                    |
| Kakapotahi                                          | S              | P52283        | 12.2                                    | 10.7                                    |
| Mt. Evans                                           | S              | P78948        | 12.5                                    | 11.0                                    |
| <b>Paringa</b>                                      |                |               |                                         |                                         |
| Domett                                              | I              | P45425        | 10.5, 10.6                              | 9.0                                     |
| Paringa                                             | I              | P45595        | 10.1, 10.3                              | 8.7                                     |
| Riwaka                                              | I              | P46105        | 10.6, 10.7                              | 9.1                                     |
| <b>Ridge</b>                                        |                |               |                                         |                                         |
| Maruia                                              | S              | P52247        | 11.8                                    | 10.3                                    |
| Horatio                                             | S              | OU49111       | 11.7, 11.8                              | 10.3                                    |
| Ridge                                               | S              | P57323        | 12.3                                    | 10.8                                    |
| <b>Tobin</b>                                        |                |               |                                         |                                         |
| Tobin                                               | I              | P61003        | 12.3, 12.5                              | 10.9                                    |
| Tobin                                               | I              | OU45278       | 12.1, 12.2                              | 10.7                                    |
| Flanagan                                            | I              | P45423        | 8.6                                     | 7.1                                     |
| Ruggedy                                             | I              | P62175        | 6.5                                     | 5.0                                     |
| Ruggedy                                             | I              | OU56533       | 6.6                                     | 5.1                                     |
| L Roxburgh                                          | I              | OU49141       | 7.2                                     | 5.7                                     |
| <b>Foulwind</b>                                     |                |               |                                         |                                         |
| Foulwind                                            | A              | OU49201       | 12.4, 12.8, 12.7                        | 11.2                                    |
| Foulwind                                            | A              | P52256        | 12.8, 13.0                              | 11.4                                    |
| Knob                                                | A              | P63648        | 8.4, 8.5 (zrn)                          | 9.6                                     |
| Toropuihi-1                                         | A              | P50892        | 7.5                                     | 6.0                                     |
| <b>Greenland Group, Buller Terrane (whole rock)</b> |                |               |                                         |                                         |
|                                                     |                | S44/p112A     | 15.5                                    |                                         |
|                                                     |                | S44/p86       | 15.9                                    |                                         |
|                                                     |                | P40732        | 15.8                                    |                                         |
|                                                     |                | P30816        | 13.7                                    |                                         |
|                                                     |                | P39122        | 16.2                                    |                                         |

**Table S4. Chemical analyses of granites  
from Marie Byrd Land**

| (wt %) XRF                       | Chester 2         | Neptune 6         |
|----------------------------------|-------------------|-------------------|
|                                  | 2-mica<br>granite | 2-mica<br>granite |
| SiO <sub>2</sub>                 | 74.15             | 75.85             |
| TiO <sub>2</sub>                 | 0.207             | 0.109             |
| Al <sub>2</sub> O <sub>3</sub>   | 14.43             | 13.17             |
| Fe <sub>2</sub> O <sub>3</sub> * | 1.49              | 1.28              |
| MnO                              | 0.036             | 0.033             |
| MgO                              | 0.28              | 0.16              |
| CaO                              | 0.93              | 0.89              |
| Na <sub>2</sub> O                | 3.24              | 3.26              |
| K <sub>2</sub> O                 | 4.98              | 4.47              |
| P <sub>2</sub> O <sub>5</sub>    | 0.186             | 0.198             |
| LOI                              |                   |                   |
| Total                            | 99.93             | 99.42             |
| (ppm) XRF                        |                   |                   |
| Ni                               | 13                | 10                |
| Cr                               | 6                 | 3                 |
| Sc                               | 1                 | 4                 |
| V                                | 12                | 0                 |
| Ba                               | 149               | 82                |
| Rb                               | 338               | 241               |
| Sr                               | 67                | 53                |
| Zr                               | 94                | 66                |
| Y                                | 23                | 22                |
| Nb                               | 16.3              | 13.2              |
| Ga                               | 22                | 18                |
| Cu                               | 2                 | 2                 |
| Zn                               | 47                | 36                |
| Pb                               | 32                | 35                |
| La                               | 0                 | 24                |
| Ce                               | 60                | 36                |
| Th                               | 16                | 9                 |
| ICP-MS:                          |                   |                   |
| La                               | 23.52             | 14.27             |
| Ce                               | 47.86             | 28.58             |
| Pr                               | 5.36              | 3.17              |
| Nd                               | 20.68             | 11.93             |
| Sm                               | 4.41              | 3.52              |
| Eu                               | 0.55              | 0.37              |
| Gd                               | 4.09              | 3.29              |
| Tb                               | 0.69              | 0.67              |
| Dy                               | 4.04              | 3.83              |
| Ho                               | 0.77              | 0.68              |
| Er                               | 2.12              | 1.83              |
| Tm                               | 0.31              | 0.26              |
| Yb                               | 1.89              | 1.63              |
| Lu                               | 0.29              | 0.25              |
| Ba                               | 180.00            | 96.00             |
| Th                               | 11.71             | 8.68              |
| Nb                               | 16.87             | 20.09             |
| Y                                | 22.96             | 21.46             |
| Hf                               | 2.92              | 2.06              |
| Ta                               | 1.93              | 3.45              |
| U                                | 1.47              | 5.63              |
| Pb                               | 32.04             | 35.20             |
| Rb                               | 337.75            | 239.35            |
| Cs                               | 12.28             | 10.43             |

Analyses performed at the GeoAnalytical  
Laboratory, Washington State University
